# Supplementary material for: Association of Dietary Patterns With Testicular Function in Young Danish Men
Source: PubMed Central journal article supplement (PMC7043196; doi:10.1001/jamanetworkopen.2019.21610), 2020-02-21
Supplement: jamanetwopen-3-e1921610-s001.pdf [file jamanetwopen-3-e1921610-s001.pdf]

## Supplementary Online Content

Nassan FL, Jensen TK, Priskorn L, Halldorsson TI, Chavarro JE, Jørgensen N. Association of dietary patterns with testicular function in young Danish men. *JAMA Netw Open*. 2020;3(2):e1921610. doi:10.1001/jamanetworkopen.2019.21610

**eFigure 1.** Flowchart for the Sample Size of the Danish Men Eligible for the Analysis

**eFigure 2.** Unadjusted Medians in Semen Quality Parameters and Testicular Volume According to Adherence to Data-Derived Dietary Patterns

**eTable 1.** Food Groupings Used in the Dietary Pattern Analyses

**eTable 2.** Total Demographic Characteristics Among 2935 Danish Young Men (2008-2017) and According to Adherence to Data-Derived Dietary Patterns

**eTable 3.** Food Group Loadings for 2 Dietary Patterns Identified From Food-Frequency Questionnaire

**eTable 4.** Summary of the Distribution of Reproductive Parameters

**eTable 5.** Unadjusted Medians in Serum Concentrations of Reproductive Hormones on the Scale for the Individual Hormones as Stated in the Table According to Adherence to Data-Derived Dietary Patterns

**eTable 6.** Adjusted Median Differences in Semen Quality Parameters According to Adherence to Data-Derived Dietary Patterns

**eTable 7.** Adjusted Probabilities of Semen Quality Parameters Below the WHO Lower Reference Limits According to Adherence to Data-Derived Dietary Patterns

**eTable 8.** Adjusted Probabilities of Semen Quality Parameters Below the Damsgaard High Semen Quality Suggested Reference Limits According to Adherence to Data-Derived Dietary Patterns

**eTable 9.** Adjusted Median Differences in Semen Quality Parameters and Testicular Volume According to Adherence to Data-Derived Dietary Patterns, Additionally Adjusted for Use of Muscle-Enhancing Supplements

**eTable 10.** Adjusted Median Differences in Serum Reproductive Hormone Concentrations on the Scale for the Individual Hormones as Stated in the Table According to Adherence to Data-Derived Dietary Patterns, Additionally Adjusted for Use of Muscle-Enhancing Supplements

**eTable 11.** Adjusted Median Differences in Semen Quality Parameters and Testicular Volume According to Adherence to Data-Derived Dietary Patterns, Without Adjustment for Body Mass Index

**eTable 12.** Adjusted Median Differences in Serum Reproductive Hormone Concentrations on the Scale for the Individual Hormones as Stated in the Table According to Adherence to Data-Derived Dietary Patterns, Without Adjustment for Body Mass Index

**eTable 13.** Adjusted Median Differences in Semen Quality Parameters and Testicular Volume According to Adherence to Data-Derived Dietary Patterns Among 2169 Men Who Did Not Report Muscle-Enhancing Supplements

**eTable 14.** Adjusted Median Differences in Serum Reproductive Hormone Concentrations on the Scale for the Individual Hormones as Stated in the Table According to Adherence to Data-Derived Dietary Patterns Among 2169 Men Who Did Not Report Muscle-Enhancing Supplements

**eTable 15.** Adjusted Median Differences in Semen Quality Parameters and Testicular Volume According to Adherence to Data-Derived Dietary Patterns Among 1175 Men Who Were Never Smokers, Never Marijuana Users, and Nonusers of Other Recreational Drugs

**eTable 16.** Adjusted Median Differences in Serum Reproductive Hormone Concentrations on the Scale for the Individual Hormones as Stated in the Table According to Adherence to Data-Derived Dietary Patterns, Among 1175 Men Who Were Never Smokers, Never Marijuana Users, and Nonusers Of Other Recreational Drugs

**eTable 17.** Demographic Characteristics of Men Who Were and Were Not Included in the Analysis

This supplementary material has been provided by the authors to give readers additional information about their work.

eFigure 1. Flowchart for the Sample Size of the Danish Men Eligible for the Analysis

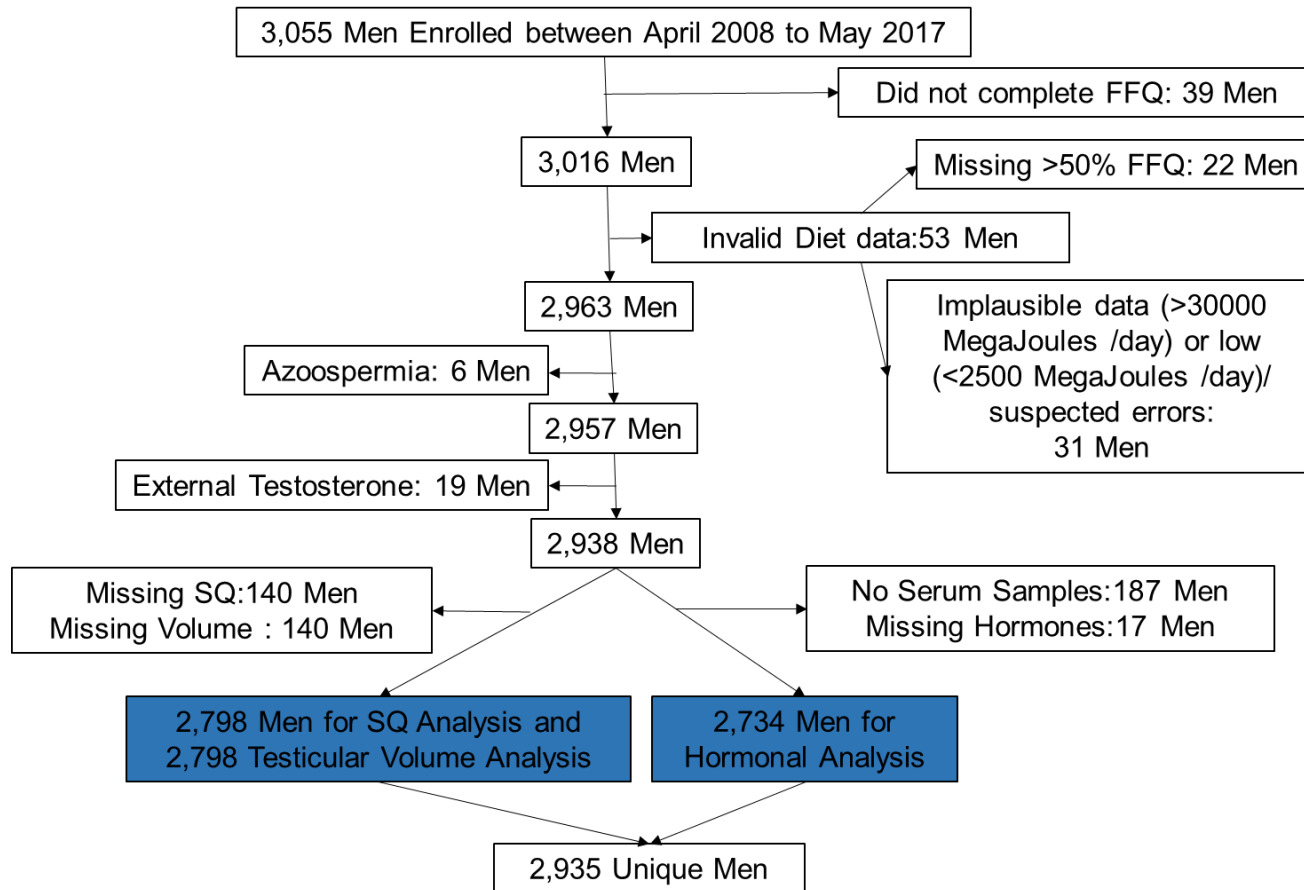

eFigure 2. Unadjusted Medians in Semen Quality Parameters and Testicular Volume According to Adherence to Data-Derived Dietary Patterns

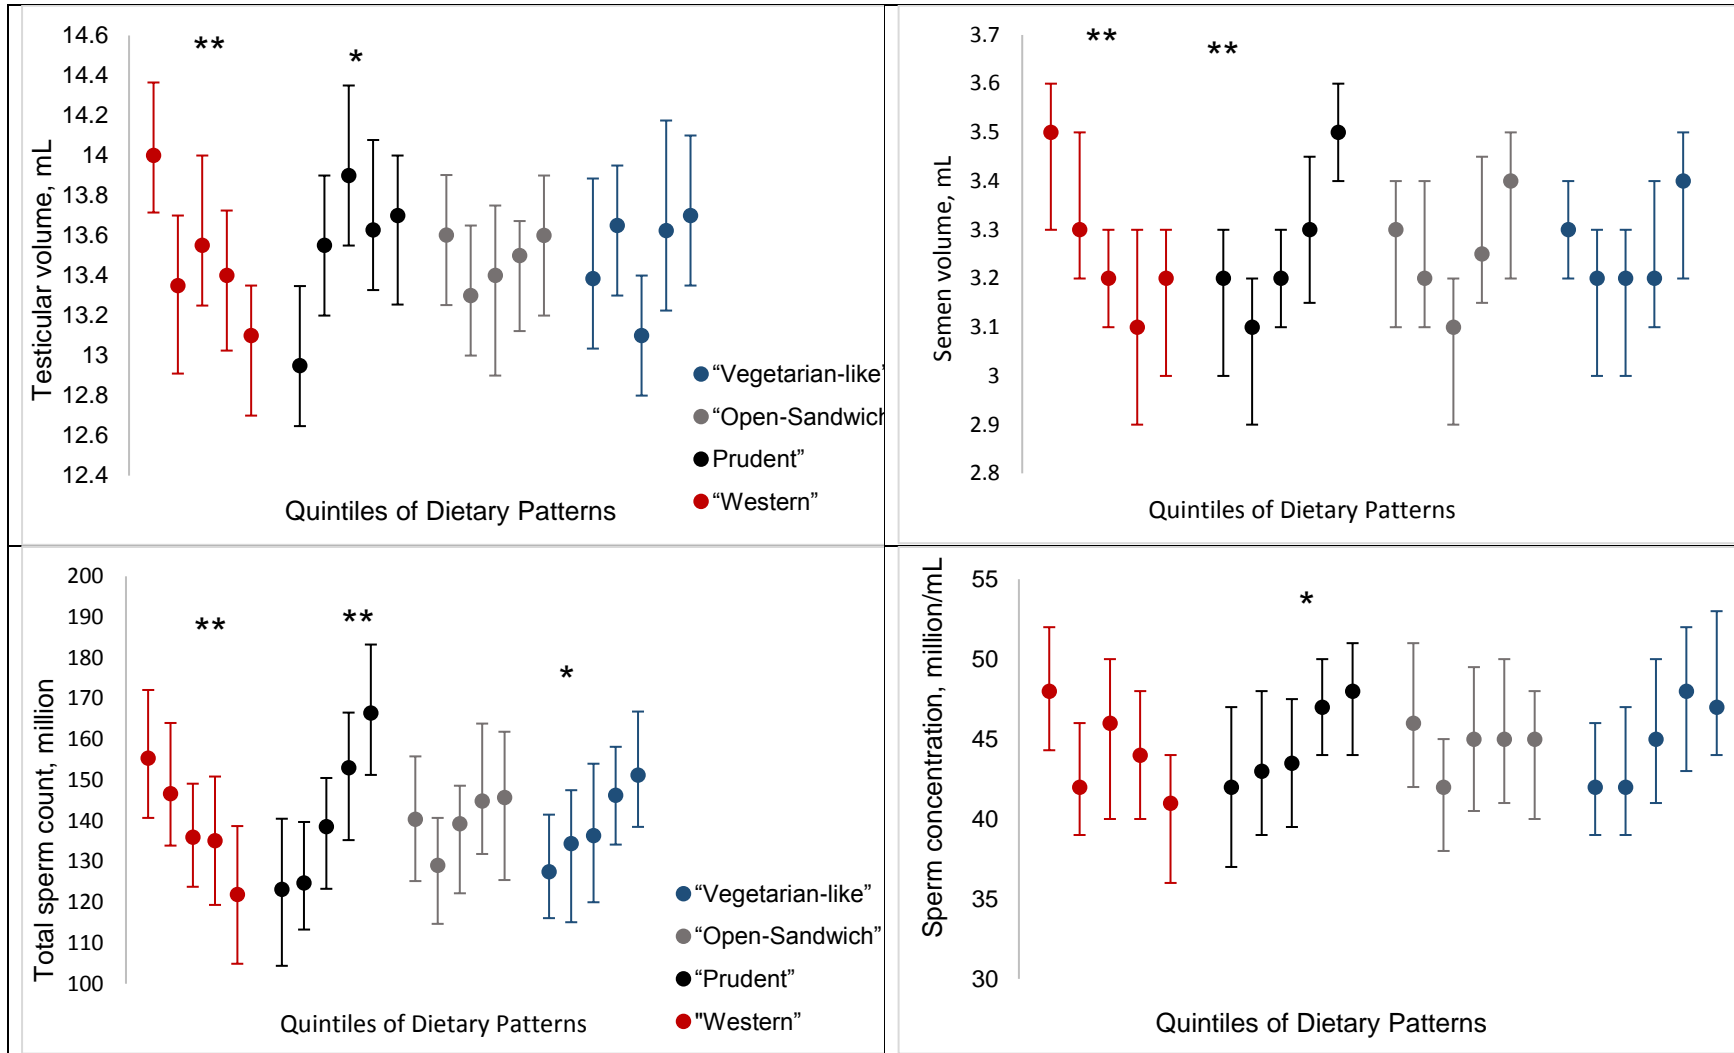

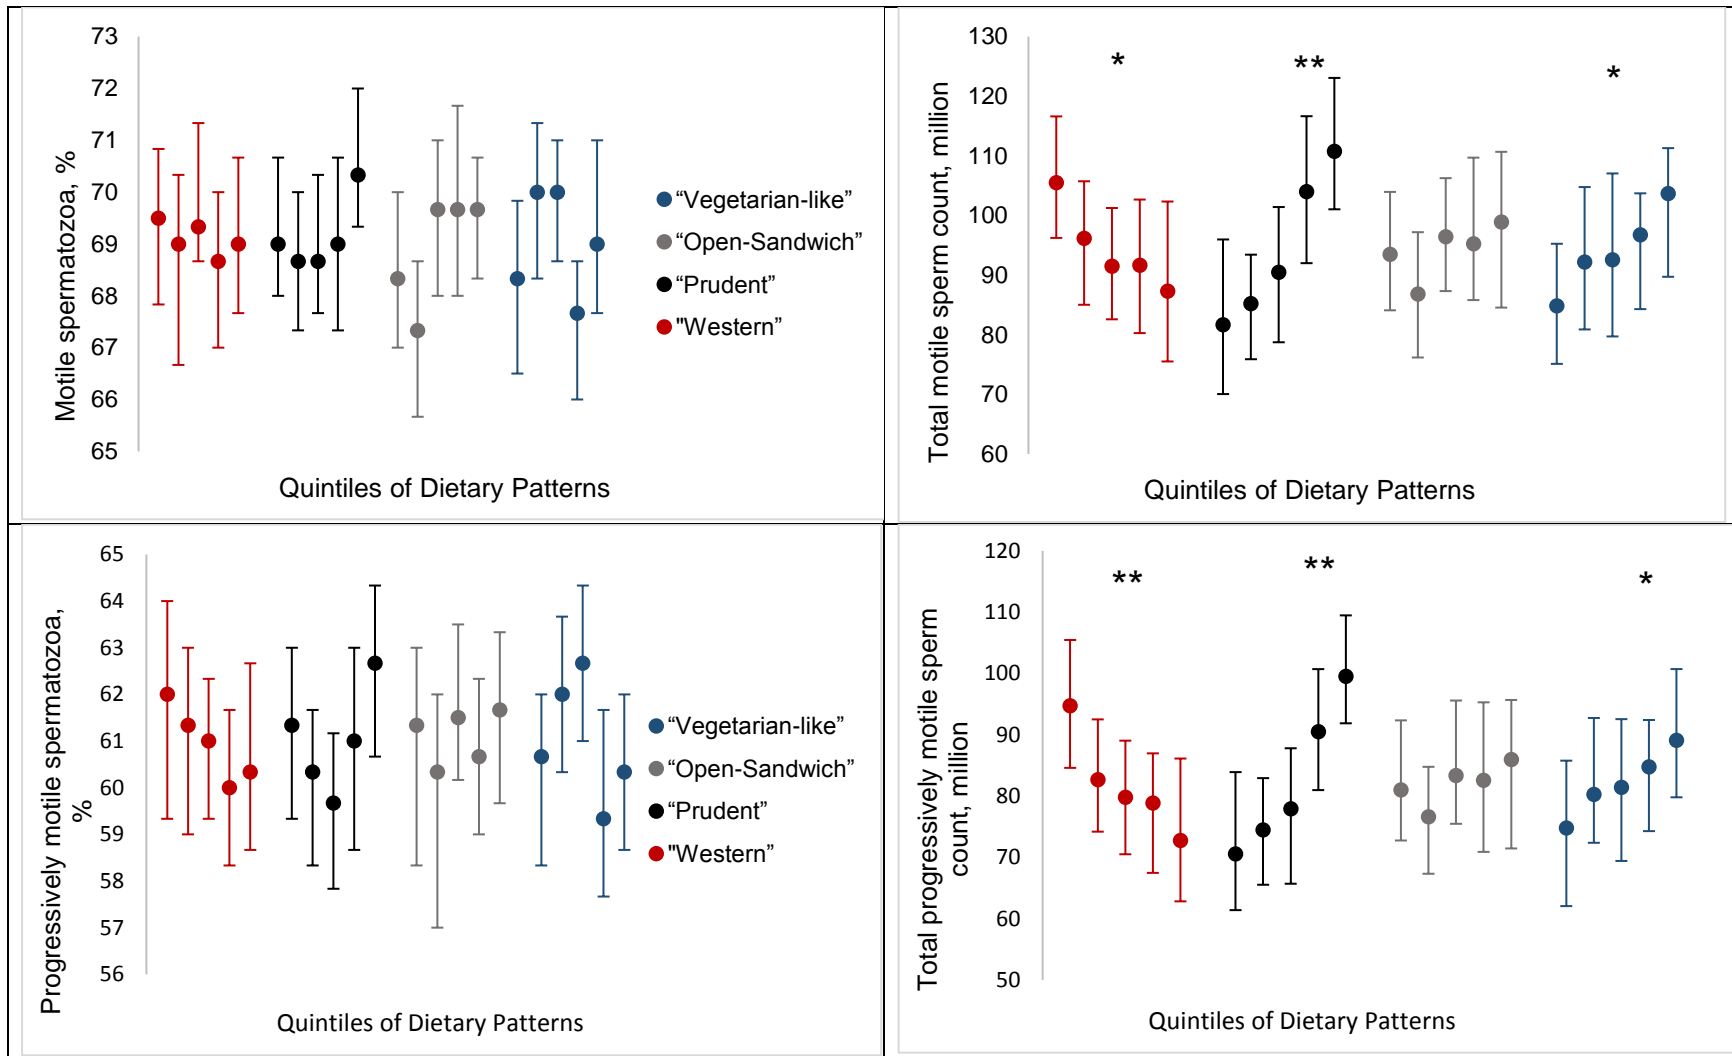

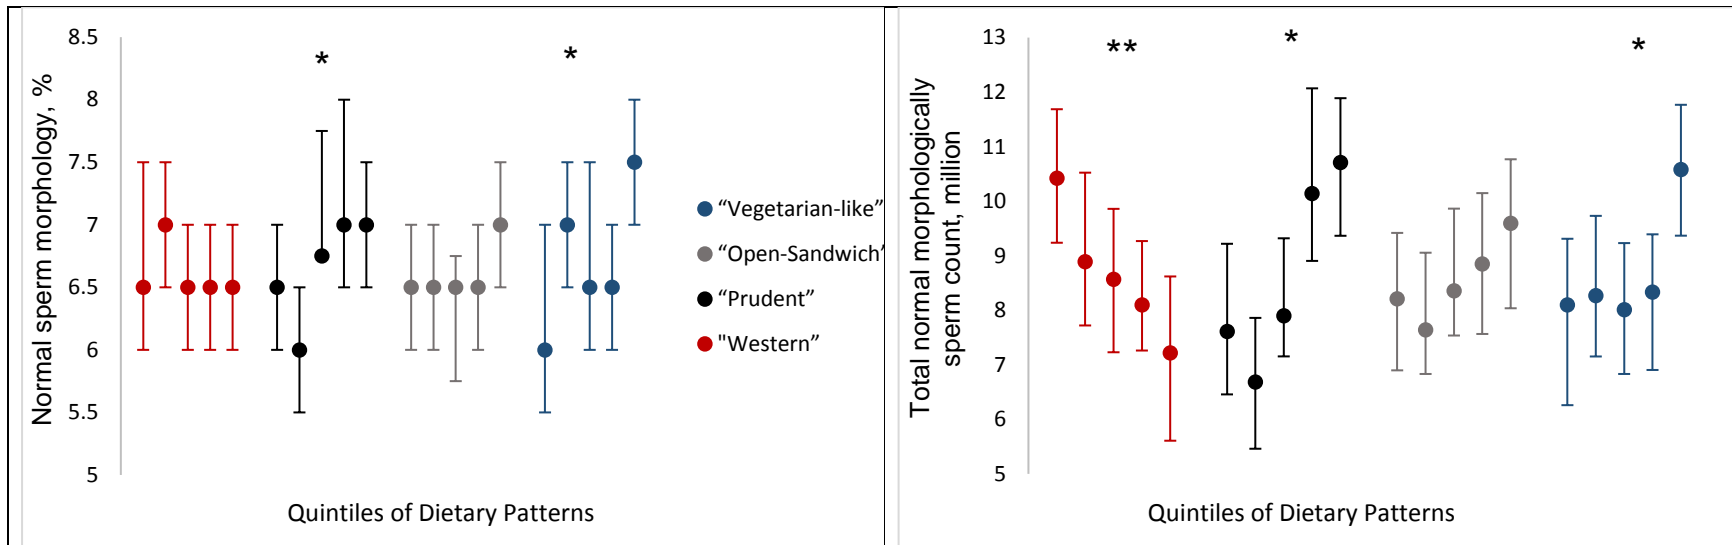

Abbreviations: Q; quintile, 95% CI; 95% confidence intervals.

Distinct colors represent different diet patterns, Red represents the “Western” Pattern, black represents the “Prudent” Pattern, grey represents the “Open-Sandwich” Pattern, and blue represents the “Vegetarian-like” Pattern.

\* Tests for trend were conducted across quintiles using the median value in each quintile of the diet patterns as a continuous variable in the regression models and p value was based on Wald test. \* indicates <0.05 and \*\* indicates < 0.01.

**eTable 1. Food Groupings Used in the Dietary Pattern Analyses**

| Number | Food groups                 | Food items -Danish                                                                                                                                                                                                                                                                                 |
|--------|-----------------------------|----------------------------------------------------------------------------------------------------------------------------------------------------------------------------------------------------------------------------------------------------------------------------------------------------|
| 1      | Cold Processed meats        | Liver paté or other paté<br>Salami / sausage<br>Saveloy<br>Sausage made of rolled meat<br>Ham or cured saddle of pork<br>Roastbeef<br>Pork filet or salted pork meat<br>Cold cuts of chicken or turkey<br>Pork roast<br>Fried liver<br>Hamburger steak and meatballs<br>Mayonnaise salat with meat |
| 2      | Warm Processed meats        | Sausage (e.g. Hotdog/fried sausage)                                                                                                                                                                                                                                                                |
| 3      | Warm Red meats              | Minced meat<br>Beef or veal meat<br>Pork<br>Lamb or mutton<br>Hamburger                                                                                                                                                                                                                            |
| 4      | Warm Organ meats            | Offal                                                                                                                                                                                                                                                                                              |
| 5      | Warm Fish and other seafood | Fatty fish<br>Lean fish<br>Shellfish                                                                                                                                                                                                                                                               |
| 6      | Cold Fish and other seafood | Smoked herring and mackerel<br>Pickled herring and the like<br>Mackerel in tomato sauce<br>Tuna fish (in water/oil/tomato)<br>Sardines in oil<br>Cod roe<br>Fish cake<br>Fish fillet<br>Shellfish<br>Caviare<br>Smoked salmon and halibut<br>Mayonnaise salat with fish<br>Eel                     |
| 7      | Warm Poultry                | Poultry                                                                                                                                                                                                                                                                                            |
| 8      | Cold Eggs                   | Egg (boiled or fried)<br>Bread with egg                                                                                                                                                                                                                                                            |
| 9      | Warm Eggs                   | Egg dishes<br>Gratin or pie                                                                                                                                                                                                                                                                        |
| 10     | Low-fat dairy products      | Curdled milk products without fruit (fat: 1,5%) or less<br>Curdled milk products with fruit (fat: 1,5%) or less<br>Semi-skimmed milk (fat: 1,5%)<br>Mini-milk (fat: 0,5%)<br>Skimmed milk (fat: 0,1%)<br>Buttermilk                                                                                |
| 11     | High-fat dairy products     | Curdled milk products without fruit (fat: 3,5%)<br>Curdled milk products with fruit (fat: 3,5%)<br>Ordinary cheese (slices)<br>Brie, camembert etc.<br>Danish blue cheese, Roquefort etc. (slices)<br>Cottage cheese or smoked fresh cheese (slices)<br>Cheese spread or cream cheese (slices)     |

|    |                                                  |                                                                                                                                                                                         |
|----|--------------------------------------------------|-----------------------------------------------------------------------------------------------------------------------------------------------------------------------------------------|
|    |                                                  | Icecream<br>Whole milk<br>Chocolate milk                                                                                                                                                |
| 12 | Dairy-based sauces                               | Melted butter or margarine as sauce<br>Bearnaise- or hollandaise-sauce etc.<br>Brown sauce or gravy<br>White sauce (e.g. Béchamel sauce)<br>Cold sauce (e.g. Yoghurt/junket/sour cream) |
| 13 | Liquor                                           | Liquor                                                                                                                                                                                  |
| 14 | Wine                                             | Red wine<br>White wine                                                                                                                                                                  |
| 15 | Beer                                             | Normal beer<br>Strong beer                                                                                                                                                              |
| 16 | Tea                                              | Tea<br>Herbal tea                                                                                                                                                                       |
| 17 | Coffee                                           | Coffee                                                                                                                                                                                  |
| 18 | Fruit                                            | Fresh fruit<br>Raisins                                                                                                                                                                  |
| 19 | Fruit juices                                     | Fruit juice                                                                                                                                                                             |
| 20 | Tomatoes                                         | Tomato sauce<br>Vegetable juice                                                                                                                                                         |
| 21 | Vegetable Salads or raw vegetable as a side      | Salad and raw vegetables                                                                                                                                                                |
| 22 | Warm vegetarian main dish                        | Vegetarian dishes                                                                                                                                                                       |
| 23 | Cooked vegetables except potatoes as a side dish | Cooked/prepared vegetables (not potatoes)                                                                                                                                               |
| 24 | Soymilk or rice-milk                             | Soymilk or rice-milk                                                                                                                                                                    |
| 25 | Potatoes                                         | Bread with boiled potatoe<br>Boiled potatoes<br>Baked potatoes<br>Pan fried potatoes<br>Mashed potatoes<br>Cream potatoes or potatoes in white sauce<br>Potato salad                    |
| 26 | French fries                                     | French fries                                                                                                                                                                            |
| 27 | Whole grains                                     | Porridge<br>Rye bread<br>Wholemeal bread<br>Crispbread                                                                                                                                  |
| 28 | Cold breakfast cereal                            | Oatmeal<br>Müsli<br>Cornflakes, Frosties etc.                                                                                                                                           |
| 29 | Refined grains                                   | White bread<br>Pasta as garniture<br>Rice, bulgur etc. as garniture                                                                                                                     |
| 30 | Pizza                                            | Pizza                                                                                                                                                                                   |
| 31 | Snacks                                           | Chips<br>Pork rinds<br>Popcorn                                                                                                                                                          |
| 32 | Nuts                                             | Peanuts, pistacies-nutc ect.<br>Other nuts (e.g. Almonds)                                                                                                                               |
| 33 | Suger-sweetened beverages                        | Coke (caffeinated soft drink with sugar)<br>Other softdrink (with sugar)<br>Fruit syrup with sugar (glass)                                                                              |
| 34 | Low-energy drinks                                | Diet/light coke                                                                                                                                                                         |



|    |                         |                                                                                                                                                                                                                                                                                                                                         |
|----|-------------------------|-----------------------------------------------------------------------------------------------------------------------------------------------------------------------------------------------------------------------------------------------------------------------------------------------------------------------------------------|
|    |                         | Other softdrink (diet/light) than cola<br>Fruit syrup without sugar (diet)                                                                                                                                                                                                                                                              |
| 35 | Mayonnaise              | Bread with mayonnaise and tartare sauce                                                                                                                                                                                                                                                                                                 |
| 36 | Sweets and desserts     | Cake (eg. Pound cake)<br>Danish pastry<br>Cream cakes and layer cakes pastry<br>Cookies, biscuits and crackers<br>Fruit dessert or fruit tart/pie<br>Dark chocolate<br>Milk chocolate<br>A mixed candy<br>Caramels / toffees<br>Drops<br>Liquorice<br>Liquorice allsorts<br>Wine gum / fruit gum<br>Cocoa<br>Pieces of chocolate (50 g) |
| 37 | Condiments              | Jam or fruit preserves/fruit jelly<br>Honey                                                                                                                                                                                                                                                                                             |
| 38 | Water and mineral water | Water<br>Mineral water (e.g., Club soda)                                                                                                                                                                                                                                                                                                |
| 39 | Cocktails               | Alcopops                                                                                                                                                                                                                                                                                                                                |
| 40 | Energy drink            | Energi-drink (eg. Red bull)                                                                                                                                                                                                                                                                                                             |

**eTable 2. Total Demographic Characteristics Among 2935 Danish Young Men (2008-2017) and According to Adherence to Data-Derived Dietary Patterns**

Panel A: Demographic characteristics among 2935 Danish young men (2008-2017).

|                                                                     |                 |
|---------------------------------------------------------------------|-----------------|
| <b>Men, N</b>                                                       | <b>2935</b>     |
| <b>Age, years</b>                                                   | 19(19,20)       |
| <b>Body mass index, Kg/m<sup>2</sup></b>                            | 22(21,24)       |
| <b>Height, m</b>                                                    | 1.82(1.77,1.87) |
| <b>Cigarettes smoking, N (%)</b>                                    |                 |
| <b>Daily</b>                                                        | 787(26.81)      |
| <b>Occasionally</b>                                                 | 683(23.27)      |
| <b>Never</b>                                                        | 1465(49.91)     |
| <b>Marijuana smoking, N (%)</b>                                     |                 |
| <b>Daily</b>                                                        | 110(3.75)       |
| <b>Occasionally</b>                                                 | 989(33.7)       |
| <b>Never</b>                                                        | 1836(62.56)     |
| <b>Other recreational drug use, N (%)</b>                           | 345(11.75)      |
| <b>Education of the mother</b>                                      |                 |
| <b>&lt; 9 years</b>                                                 | 92(3.13)        |
| <b>9-10 years</b>                                                   | 725(24.7)       |
| <b>&gt; 11 years</b>                                                | 1665(56.73)     |
| <b>Other</b>                                                        | 183(6.24)       |
| <b>Missing/do Not know</b>                                          | 270(9.2)        |
| <b>Moderate and vigorous physical activities, hr/wk</b>             | 8(4,14)         |
| <b>Fever in last 3 months, N (%)</b>                                | 239(8.14)       |
| <b>Self-reported history of reproductive diseases, N (%)</b>        | 605(20.61)      |
| <b>Self-reported history of reproductive surgery, N (%)</b>         | 332(11.31)      |
| <b>Self-reported history of STDs, N (%)</b>                         | 333(11.35)      |
| <b>Use of muscle-enhancing products in the last 3 months, N (%)</b> | 752(25.74)      |
| <b>Abstinence time, hours</b>                                       | 62(57,84)       |
| <b>Sample collected during warm season, N (%)</b>                   | 950(32.37)      |
| <b>Time of day of sample collection, hour</b>                       | 10(9,11)        |
| <b>Time to semen analysis, min</b>                                  | 30(20,45)       |
| <b>Total energy intake, Kcal/day</b>                                | 1990(1536,2547) |
| <b>Dietary protein (% of energy)</b>                                | 17(16,20)       |
| Total protein, g/day                                                | 87(78,98)       |
| <b>Total dietary fat (% of energy)</b>                              | 34(30,38)       |
| Total fat, g/day                                                    | 75(66,83)       |
| <b>Saturated dietary fat (% of energy)</b>                          | 13(11,15)       |
| Saturated fatty acids, g/day                                        | 29(25,34)       |
| <b>Monounsaturated dietary fat (% of energy)</b>                    | 12(10,13)       |
| Mono-unsaturated fatty acids, g/day                                 | 26(23,29)       |
| <b>Polyunsaturated dietary fat (% of energy)</b>                    | 5(4,6)          |
| Poly-unsaturated fatty acids, g/day                                 | 11(10,12)       |
| Eicosapentaenoic acid (EPA) and Docosahexaenoic acid (DHA), mg/day  | 395(236,655)    |
| N3 Poly unsaturated fatty acids, g/day                              | 2(2,3)          |
| N6 Poly unsaturated fatty acids, g/day                              | 8(7,9)          |
| <b>Dietary carbohydrate (% of energy)</b>                           | 48(43,53)       |
| Total carbohydrates, g/day                                          | 240(215,264)    |
| Total fiber, g/day                                                  | 18(14,23)       |
| Total sugar, g/day                                                  | 81(62,103)      |
| Added sugar, g/day                                                  | 34(21,53)       |
| Carotenoids, ug /day                                                | 2034(1111,4073) |

|                      |                 |
|----------------------|-----------------|
| Retinol, ug/day      | 722(548,1030)   |
| Vitamin B6, mg /day  | 1(1,2)          |
| Folic acid, ug /day  | 247(212,291)    |
| Vitamin B12, ug /day | 6(5,8)          |
| Vitamin C, mg /day   | 64(49,84)       |
| Vitamin D, ug /day   | 4(3,6)          |
| Vitamin E, α-TE /day | 6(5,7)          |
| Vitamin B2, mg /day  | 2(1,2)          |
| Sodium, mg /day      | 2934(2582,3257) |
| Potassium, mg /day   | 2754(2437,3138) |
| Iron, mg /day        | 10(9,11)        |
| Calcium, mg /day     | 945(737,1227)   |
| Zinc, mg /day        | 11(10,12)       |

eTable 2: Panel B Demographic characteristics according to adherence to data-derived “Western” diet Pattern among 2935 Danish young men (2008-2017).

| Quintiles                                                           | Q1              | Q2              | Q3              | Q4              | Q5              | P-Value |
|---------------------------------------------------------------------|-----------------|-----------------|-----------------|-----------------|-----------------|---------|
| <b>Men, N</b>                                                       | 587             | 587             | 587             | 587             | 587             |         |
| <b>Age, years</b>                                                   | 19(19,20)       | 19(19,20)       | 19(19,20)       | 19(19,19)       | 19(19,20)       | 0.85    |
| <b>Body mass index, Kg/m<sup>2</sup></b>                            | 22(21,24)       | 22(21,24)       | 22(21,24)       | 22(21,24)       | 22(20,24)       | 0.02    |
| <b>Height, m</b>                                                    | 1.82(1.78,1.87) | 1.82(1.77,1.87) | 1.81(1.77,1.87) | 1.82(1.77,1.87) | 1.81(1.77,1.86) | 0.21    |
| <b>Cigarettes smoking, N (%)</b>                                    |                 |                 |                 |                 |                 | <0.0001 |
| <b>Daily</b>                                                        | 83(14.14)       | 127(21.64)      | 163(27.77)      | 181(30.83)      | 233(39.69)      |         |
| <b>Occasionally</b>                                                 | 127(21.64)      | 148(25.21)      | 139(23.68)      | 141(24.02)      | 128(21.81)      |         |
| <b>Never</b>                                                        | 377(64.22)      | 312(53.15)      | 285(48.55)      | 265(45.14)      | 226(38.5)       |         |
| <b>Marijuana smoking, N (%)</b>                                     |                 |                 |                 |                 |                 | <0.0001 |
| <b>Daily</b>                                                        | 11(1.87)        | 10(1.7)         | 14(2.39)        | 31(5.28)        | 44(7.5)         |         |
| <b>Occasionally</b>                                                 | 136(23.17)      | 186(31.69)      | 217(36.97)      | 210(35.78)      | 240(40.89)      |         |
| <b>Never</b>                                                        | 440(74.96)      | 391(66.61)      | 356(60.65)      | 346(58.94)      | 303(51.62)      |         |
| <b>Other recreational drug use, N (%)</b>                           | 45(7.67)        | 48(8.18)        | 61(10.39)       | 83(14.14)       | 108(18.4)       | <0.0001 |
| <b>Education of the mother</b>                                      |                 |                 |                 |                 |                 | 0.001   |
| <b>&lt; 9 years</b>                                                 | 14(2.39)        | 17(2.9)         | 15(2.56)        | 18(3.07)        | 28(4.77)        |         |
| <b>9-10 years</b>                                                   | 159(27.09)      | 147(25.04)      | 146(24.87)      | 143(24.36)      | 130(22.15)      |         |
| <b>&gt; 11 years</b>                                                | 336(57.24)      | 334(56.9)       | 337(57.41)      | 332(56.56)      | 326(55.54)      |         |
| <b>Other</b>                                                        | 44(7.5)         | 45(7.67)        | 32(5.45)        | 38(6.47)        | 24(4.09)        |         |
| <b>Missing/do Not know</b>                                          | 34(5.79)        | 44(7.5)         | 57(9.71)        | 56(9.54)        | 79(13.46)       |         |
| <b>Moderate and vigorous physical activities, hr/wk</b>             | 9(5,14)         | 9(5,14)         | 7(4,13)         | 7(4,12)         | 8(4,14)         | 0.0004  |
| <b>Fever in last 3 months, N (%)</b>                                | 43(7.33)        | 48(8.18)        | 56(9.54)        | 48(8.18)        | 44(7.5)         | 0.67    |
| <b>Self-reported history of reproductive diseases, N (%)</b>        | 107(18.23)      | 118(20.1)       | 111(18.91)      | 124(21.12)      | 145(24.7)       | 0.05    |
| <b>Self-reported history of reproductive surgery, N (%)</b>         | 70(11.93)       | 68(11.58)       | 57(9.71)        | 65(11.07)       | 72(12.27)       | 0.68    |
| <b>Self-reported history of STDs, N (%)</b>                         | 43(7.33)        | 59(10.05)       | 53(9.03)        | 80(13.63)       | 98(16.7)        | <0.0001 |
| <b>Use of muscle-enhancing products in the last 3 months, N (%)</b> | 193(33.1)       | 164(27.99)      | 148(25.26)      | 140(24.05)      | 107(18.32)      | <0.0001 |
| <b>Abstinence time, hours</b>                                       | 62(58,85)       | 61(57,83)       | 61(58,83)       | 61(56,83)       | 62(56,84)       | 0.0308  |
| <b>Sample collected during warm season, N (%)</b>                   | 204(34.75)      | 185(31.52)      | 186(31.69)      | 181(30.83)      | 194(33.05)      | 0.63    |
| <b>Time of day of sample collection, hour</b>                       | 10(9,11)        | 10(9,11)        | 10(9,11)        | 10(9,11)        | 10(10,11)       | 0.0006  |
| <b>Time to semen analysis, min</b>                                  | 30(20,45)       | 30(20,40)       | 30(20,46)       | 30(20,45)       | 30(25,50)       | 0.0062  |
| <b>Total energy intake, Kcal/day</b>                                | 1821(1398,2373) | 1800(1380,2357) | 1915(1503,2404) | 2100(1632,2583) | 2303(1847,3015) | <0.0001 |
| <b>Dietary protein (% of energy)</b>                                | 18(16,21)       | 18(16,20)       | 18(16,20)       | 17(16,19)       | 17(15,19)       | <0.0001 |
| Total protein, g/day                                                | 88(80,101)      | 89(79,99)       | 87(78,99)       | 87(78,96)       | 85(76,95)       | <0.0001 |
| <b>Total dietary fat (% of energy)</b>                              | 31(28,35)       | 34(30,37)       | 34(30,37)       | 35(31,39)       | 34(29,39)       | <0.0001 |
| Total fat, g/day                                                    | 70(63,79)       | 75(67,83)       | 75(67,83)       | 78(69,86)       | 76(64,86)       | <0.0001 |
| <b>Saturated dietary fat (% of energy)</b>                          | 12(10,14)       | 13(12,15)       | 13(12,15)       | 14(12,16)       | 14(11,16)       | <0.0001 |
| Saturated fatty acids, g/day                                        | 27(23,31)       | 29(26,33)       | 30(26,34)       | 31(27,35)       | 30(25,34)       | <0.0001 |
| <b>Monounsaturated dietary fat (% of energy)</b>                    | 11(10,12)       | 12(10,13)       | 12(10,13)       | 12(11,14)       | 12(10,14)       | <0.0001 |

|                                                                    |                 |                 |                 |                 |                 |         |
|--------------------------------------------------------------------|-----------------|-----------------|-----------------|-----------------|-----------------|---------|
| Mono-unsaturated fatty acids, g/day                                | 24(22,27)       | 26(23,29)       | 26(23,29)       | 27(24,30)       | 26(22,30)       | <0.0001 |
| <b>Polyunsaturated dietary fat (% of energy)</b>                   | 5(4,5)          | 5(4,6)          | 5(4,6)          | 5(5,6)          | 5(4,6)          | 0.05    |
| Poly-unsaturated fatty acids, g/day                                | 11(10,12)       | 11(10,12)       | 11(10,12)       | 11(10,13)       | 11(10,13)       | 0.02    |
| Eicosapentaenoic acid (EPA) and Docosahexaenoic acid (DHA), mg/day | 392(243,683)    | 415(240,685)    | 404(243,670)    | 395(237,620)    | 365(210,629)    | 0.17    |
| N3 Poly unsaturated fatty acids, g/day                             | 2(2,2)          | 2(2,3)          | 2(2,3)          | 2(2,3)          | 2(2,3)          | 0.22    |
| N6 Poly unsaturated fatty acids, g/day                             | 8(7,9)          | 8(8,9)          | 8(7,9)          | 9(8,10)         | 8(7,10)         | 0.006   |
| <b>Dietary carbohydrate (% of energy)</b>                          | 50(45,54)       | 48(43,52)       | 48(43,52)       | 46(42,51)       | 48(42,55)       | <0.0001 |
| Total carbohydrates, g/day                                         | 253(227,272)    | 240(219,260)    | 239(214,260)    | 233(209,253)    | 237(209,270)    | <0.0001 |
| Total fiber, g/day                                                 | 24(18,30)       | 20(15,24)       | 18(14,22)       | 17(13,21)       | 15(12,19)       | <0.0001 |
| Total sugar, g/day                                                 | 75(58,92)       | 78(62,96)       | 83(64,104)      | 81(64,104)      | 90(67,123)      | <0.0001 |
| Added sugar, g/day                                                 | 23(13,38)       | 30(19,44)       | 36(22,54)       | 39(23,54)       | 48(30,72)       | <0.0001 |
| Carotenoids, ug /day                                               | 2568(1318,5248) | 2075(1164,3970) | 2167(1161,4283) | 1836(964,3388)  | 1788(960,3776)  | <0.0001 |
| Retinol, ug/day                                                    | 715(534,1048)   | 740(568,1074)   | 716(542,985)    | 750(561,1050)   | 700(530,1011)   | 0.28    |
| Vitamin B6, mg /day                                                | 1(1,2)          | 1(1,2)          | 1(1,2)          | 1(1,1)          | 1(1,1)          | <0.0001 |
| Folic acid, ug /day                                                | 271(230,321)    | 247(217,297)    | 246(208,283)    | 236(207,275)    | 234(199,280)    | <0.0001 |
| Vitamin B12, ug /day                                               | 7(5,9)          | 7(5,8)          | 6(5,8)          | 6(5,8)          | 6(5,8)          | <0.0001 |
| Vitamin C, mg /day                                                 | 65(47,87)       | 63(49,84)       | 66(52,85)       | 65(48,83)       | 63(49,80)       | 0.25    |
| Vitamin D, ug /day                                                 | 4(3,6)          | 5(3,7)          | 5(3,7)          | 4(3,6)          | 4(3,6)          | 0.03    |
| Vitamin E, α-TE /day                                               | 6(5,7)          | 6(5,7)          | 6(5,7)          | 6(5,7)          | 6(5,7)          | 0.07    |
| Vitamin B2, mg /day                                                | 2(1,2)          | 2(1,2)          | 2(1,2)          | 2(1,2)          | 2(1,2)          | <0.0001 |
| Sodium, mg /day                                                    | 3141(2761,3465) | 2963(2673,3284) | 2939(2576,3242) | 2872(2565,3184) | 2735(2446,3110) | <0.0001 |
| Potassium, mg /day                                                 | 2880(2551,3246) | 2796(2475,3136) | 2733(2424,3149) | 2700(2406,3058) | 2673(2349,3054) | <0.0001 |
| Iron, mg /day                                                      | 11(10,12)       | 10(9,11)        | 10(9,11)        | 10(9,11)        | 10(9,11)        | <0.0001 |
| Calcium, mg /day                                                   | 1009(782,1270)  | 977(757,1249)   | 925(722,1217)   | 909(737,1168)   | 921(700,1212)   | 0.0003  |
| Zinc, mg /day                                                      | 12(11,13)       | 11(10,13)       | 11(10,12)       | 11(10,12)       | 11(10,12)       | <0.0001 |

eTable 2: Panel C. Demographic characteristics according to adherence to data-derived “Prudent” diet Pattern among 2935 Danish young men (2008-2017).

| Quintiles                                                           | Q1              | Q2              | Q3              | Q4              | Q5              | P-Value |
|---------------------------------------------------------------------|-----------------|-----------------|-----------------|-----------------|-----------------|---------|
| <b>Men, N</b>                                                       | 587             | 587             | 587             | 587             | 587             |         |
| <b>Age, years</b>                                                   | 19(19,20)       | 19(19,20)       | 19(19,19)       | 19(19,20)       | 19(19,20)       | 0.11    |
| <b>Body mass index, Kg/m<sup>2</sup></b>                            | 22(20,24)       | 22(20,24)       | 22(21,24)       | 22(21,24)       | 22(21,24)       | 0.001   |
| <b>Height, m</b>                                                    | 1.81(1.76,1.86) | 1.82(1.78,1.87) | 1.82(1.77,1.87) | 1.82(1.78,1.87) | 1.82(1.78,1.87) | 0.001   |
| <b>Cigarettes smoking, N (%)</b>                                    |                 |                 |                 |                 |                 | <0.0001 |
| <b>Daily</b>                                                        | 215(36.63)      | 173(29.47)      | 158(26.92)      | 128(21.81)      | 113(19.25)      |         |
| <b>Occasionally</b>                                                 | 116(19.76)      | 136(23.17)      | 130(22.15)      | 155(26.41)      | 146(24.87)      |         |
| <b>Never</b>                                                        | 256(43.61)      | 278(47.36)      | 299(50.94)      | 304(51.79)      | 328(55.88)      |         |
| <b>Marijuana smoking, N (%)</b>                                     |                 |                 |                 |                 |                 | 0.0001  |
| <b>Daily</b>                                                        | 40(6.81)        | 23(3.92)        | 18(3.07)        | 16(2.73)        | 13(2.21)        |         |
| <b>Occasionally</b>                                                 | 215(36.63)      | 196(33.39)      | 198(33.73)      | 205(34.92)      | 175(29.81)      |         |
| <b>Never</b>                                                        | 332(56.56)      | 368(62.69)      | 371(63.2)       | 366(62.35)      | 399(67.97)      |         |
| <b>Other recreational drug use, N (%)</b>                           | 80(13.63)       | 70(11.93)       | 72(12.27)       | 64(10.9)        | 59(10.05)       | 0.38    |
| <b>Education of the mother</b>                                      |                 |                 |                 |                 |                 | <0.0001 |
| <b>&lt; 9 years</b>                                                 | 32(5.45)        | 11(1.87)        | 17(2.9)         | 18(3.07)        | 14(2.39)        |         |
| <b>9-10 years</b>                                                   | 159(27.09)      | 159(27.09)      | 156(26.58)      | 130(22.15)      | 121(20.61)      |         |
| <b>&gt; 11 years</b>                                                | 293(49.91)      | 318(54.17)      | 342(58.26)      | 346(58.94)      | 366(62.35)      |         |
| <b>Other</b>                                                        | 22(3.75)        | 41(6.98)        | 34(5.79)        | 44(7.5)         | 42(7.16)        |         |
| <b>Missing/do Not know</b>                                          | 81(13.8)        | 58(9.88)        | 38(6.47)        | 49(8.35)        | 44(7.5)         |         |
| <b>Moderate and vigorous physical activities, hr/wk</b>             | 6(3,11)         | 7(4,12)         | 8(4,13)         | 9(5,14)         | 10(7,16)        | <0.0001 |
| <b>Fever in last 3 months, N (%)</b>                                | 39(6.64)        | 51(8.69)        | 50(8.52)        | 54(9.2)         | 45(7.67)        | 0.53    |
| <b>Self-reported history of reproductive diseases, N (%)</b>        | 113(19.25)      | 127(21.64)      | 113(19.25)      | 130(22.15)      | 122(20.78)      | 0.63    |
| <b>Self-reported history of reproductive surgery, N (%)</b>         | 58(9.88)        | 66(11.24)       | 68(11.58)       | 61(10.39)       | 79(13.46)       | 0.35    |
| <b>Self-reported history of STDs, N (%)</b>                         | 87(14.82)       | 64(10.9)        | 57(9.71)        | 62(10.56)       | 63(10.73)       | 0.05    |
| <b>Use of muscle-enhancing products in the last 3 months, N (%)</b> | 90(15.44)       | 117(20)         | 122(21)         | 187(31.91)      | 236(40.27)      | <0.0001 |
| <b>Abstinence time, hours</b>                                       | 61(56,84)       | 61(57,83)       | 61(57,83)       | 62(58,84)       | 63(58,85)       | 0.03    |
| <b>Sample collected during warm season, N (%)</b>                   | 179(30.49)      | 184(31.35)      | 188(32.03)      | 195(33.22)      | 204(34.75)      | 0.56    |
| <b>Time of day of sample collection, hour</b>                       | 10(10,11)       | 10(9,11)        | 10(9,11)        | 10(9,10)        | 10(9,11)        | 0.003   |
| <b>Time to semen analysis, min</b>                                  | 30(22,50)       | 30(20,45)       | 30(20,45)       | 30(20,45)       | 30(20,45)       | 0.09    |
| <b>Total energy intake, Kcal/day</b>                                | 1881(1416,2482) | 1820(1431,2356) | 1968(1517,2519) | 2011(1592,2517) | 2278(1800,2906) | <0.0001 |
| <b>Dietary protein (% of energy)</b>                                | 16(15,18)       | 17(15,19)       | 17(16,19)       | 18(16,20)       | 19(16,21)       | <0.0001 |

|                                                                    |                |                |                 |                 |                 |             |
|--------------------------------------------------------------------|----------------|----------------|-----------------|-----------------|-----------------|-------------|
| Total protein, g/day                                               | 81(74,90)      | 86(77,95)      | 87(79,96)       | 90(80,100)      | 94(83,106)      | <0.000<br>1 |
| <b>Total dietary fat (% of energy)</b>                             | 33(29,38)      | 34(30,38)      | 34(30,38)       | 33(30,37)       | 33(29,37)       | 0.44        |
| Total fat, g/day                                                   | 74(65,84)      | 75(66,84)      | 76(67,84)       | 74(66,82)       | 74(65,83)       | 0.36        |
| <b>Saturated dietary fat (% of energy)</b>                         | 13(11,15)      | 13(12,15)      | 13(12,15)       | 13(11,15)       | 13(11,15)       | 0.02        |
| Saturated fatty acids, g/day                                       | 30(25,34)      | 30(26,34)      | 30(26,34)       | 29(25,33)       | 29(24,33)       | 0.004       |
| <b>Monounsaturated dietary fat (% of energy)</b>                   | 11(10,13)      | 12(10,13)      | 12(10,13)       | 12(10,13)       | 12(10,13)       | 0.55        |
| Mono-unsaturated fatty acids, g/day                                | 25(22,30)      | 26(23,29)      | 26(23,30)       | 26(23,29)       | 26(23,29)       | 0.57        |
| <b>Polyunsaturated dietary fat (% of energy)</b>                   | 5(4,6)         | 5(4,6)         | 5(5,6)          | 5(4,6)          | 5(5,6)          | <0.000<br>1 |
| Poly-unsaturated fatty acids, g/day                                | 11(9,12)       | 11(10,12)      | 11(10,13)       | 11(10,13)       | 11(10,13)       | <0.000<br>1 |
| Eicosapentaenoic acid (EPA) and Docosahexaenoic acid (DHA), mg/day | 316(198,562)   | 355(218,569)   | 386(233,614)    | 422(259,680)    | 506(302,856)    | <.0001      |
| N3 Poly unsaturated fatty acids, g/day                             | 2(2,2)         | 2(2,3)         | 2(2,3)          | 2(2,3)          | 2(2,3)          | <0.000<br>1 |
| N6 Poly unsaturated fatty acids, g/day                             | 8(7,9)         | 8(7,9)         | 9(8,10)         | 8(8,9)          | 9(8,10)         | 0.0005      |
| <b>Dietary carbohydrate (% of energy)</b>                          | 49(45,54)      | 48(44,53)      | 48(43,53)       | 48(43,52)       | 47(42,52)       | <0.000<br>1 |
| Total carbohydrates, g/day                                         | 247(224,271)   | 241(219,265)   | 239(213,264)    | 239(215,259)    | 233(206,259)    | <0.000<br>1 |
| Total fiber, g/day                                                 | 18(13,22)      | 18(13,23)      | 19(14,23)       | 19(15,24)       | 19(15,24)       | <0.000<br>1 |
| Total sugar, g/day                                                 | 92(70,119)     | 82(63,104)     | 78(62,99)       | 79(61,97)       | 76(58,96)       | <0.000<br>1 |
| Added sugar, g/day                                                 | 47(30,68)      | 37(23,55)      | 32(22,49)       | 31(17,47)       | 27(16,43)       | <0.000<br>1 |
| Carotenoids, ug /day                                               | 1353(786,2856) | 1610(992,2912) | 2062(1158,3752) | 2523(1468,4608) | 3348(1746,6093) | <0.000<br>1 |
| Retinol, ug/day                                                    | 738(558,1025)  | 757(552,1093)  | 707(533,984)    | 711(556,992)    | 709(533,1034)   | 0.23        |
| Vitamin B6, mg /day                                                | 1(1,1)         | 1(1,1)         | 1(1,1)          | 1(1,2)          | 1(1,2)          | <0.000<br>1 |
| Folic acid, ug /day                                                | 228(196,269)   | 235(202,271)   | 244(212,287)    | 260(221,304)    | 271(229,324)    | <0.000<br>1 |
| Vitamin B12, ug /day                                               | 6(5,8)         | 6(5,8)         | 6(5,8)          | 6(5,8)          | 7(5,9)          | <0.000<br>1 |
| Vitamin C, mg /day                                                 | 58(45,74)      | 60(46,79)      | 66(51,84)       | 70(55,87)       | 71(54,93)       | <0.000<br>1 |
| Vitamin D, ug /day                                                 | 4(3,5)         | 4(3,6)         | 4(3,6)          | 5(3,7)          | 5(4,8)          | <0.000<br>1 |

|                              |                     |                     |                     |                     |                     |             |
|------------------------------|---------------------|---------------------|---------------------|---------------------|---------------------|-------------|
| Vitamin E, $\alpha$ -TE /day | 5(5,6)              | 6(5,6)              | 6(5,7)              | 6(5,7)              | 6(5,7)              | <0.000<br>1 |
| Vitamin B2, mg /day          | 2(1,2)              | 2(1,2)              | 2(1,2)              | 2(1,2)              | 2(1,2)              | 0.0002      |
| Sodium, mg /day              | 2857(2488,320<br>3) | 2947(2573,325<br>5) | 2970(2608,328<br>0) | 2941(2645,325<br>3) | 2928(2586,326<br>9) | 0.03        |
| Potassium, mg /day           | 2632(2315,303<br>6) | 2672(2374,302<br>7) | 2729(2413,304<br>6) | 2812(2526,319<br>7) | 2922(2592,328<br>7) | <0.000<br>1 |
| Iron, mg /day                | 10(9,11)            | 10(9,11)            | 10(9,11)            | 10(10,11)           | 11(10,12)           | <0.000<br>1 |
| Calcium, mg /day             | 945(743,1229)       | 938(736,1221)       | 939(736,1231)       | 963(732,1220)       | 952(742,1230)       | 0.99        |
| Zinc, mg /day                | 11(10,12)           | 11(10,12)           | 11(10,12)           | 12(10,13)           | 12(11,13)           | <0.000<br>1 |



eTable 2: Panel D. Demographic characteristics according to adherence to data-derived “Open-Sandwich” diet Pattern among 2935 Danish young men (2008-2017).

| Quintiles                                                           | Q1              | Q2              | Q3              | Q4              | Q5              | P-Value |
|---------------------------------------------------------------------|-----------------|-----------------|-----------------|-----------------|-----------------|---------|
| <b>Men, N</b>                                                       | 587             | 587             | 587             | 587             | 587             |         |
| <b>Age, years</b>                                                   | 19(19,20)       | 19(19,20)       | 19(19,20)       | 19(19,20)       | 19(19,20)       | 0.15    |
| <b>Body mass index, Kg/m<sup>2</sup></b>                            | 22(20,24)       | 22(21,24)       | 22(20,24)       | 22(21,24)       | 22(21,24)       | 0.59    |
| <b>Height, m</b>                                                    | 1.81(1.76,1.86) | 1.82(1.77,1.87) | 1.82(1.78,1.86) | 1.83(1.78,1.87) | 1.83(1.78,1.88) | <.0001  |
| <b>Cigarettes smoking, N (%)</b>                                    |                 |                 |                 |                 |                 | 0.02    |
| <b>Daily</b>                                                        | 180(30.66)      | 164(27.94)      | 164(27.94)      | 144(24.53)      | 135(23)         |         |
| <b>Occasionally</b>                                                 | 138(23.51)      | 150(25.55)      | 135(23)         | 126(21.47)      | 134(22.83)      |         |
| <b>Never</b>                                                        | 269(45.83)      | 273(46.51)      | 288(49.06)      | 317(54)         | 318(54.17)      |         |
| <b>Marijuana smoking, N (%)</b>                                     |                 |                 |                 |                 |                 | 0.11    |
| <b>Daily</b>                                                        | 25(4.26)        | 25(4.26)        | 15(2.56)        | 27(4.6)         | 18(3.07)        |         |
| <b>Occasionally</b>                                                 | 213(36.29)      | 208(35.43)      | 207(35.26)      | 179(30.49)      | 182(31.01)      |         |
| <b>Never</b>                                                        | 349(59.45)      | 354(60.31)      | 365(62.18)      | 381(64.91)      | 387(65.93)      |         |
| <b>Other recreational drug use, N (%)</b>                           | 77(13.12)       | 66(11.24)       | 70(11.93)       | 70(11.93)       | 62(10.56)       | 0.73    |
| <b>Education of the mother</b>                                      |                 |                 |                 |                 |                 | 0.004   |
| <b>&lt; 9 years</b>                                                 | 34(5.79)        | 12(2.04)        | 18(3.07)        | 12(2.04)        | 16(2.73)        |         |
| <b>9-10 years</b>                                                   | 149(25.38)      | 145(24.7)       | 142(24.19)      | 145(24.7)       | 144(24.53)      |         |
| <b>&gt; 11 years</b>                                                | 301(51.28)      | 336(57.24)      | 334(56.9)       | 360(61.33)      | 334(56.9)       |         |
| <b>Other</b>                                                        | 38(6.47)        | 31(5.28)        | 40(6.81)        | 34(5.79)        | 40(6.81)        |         |
| <b>Missing/do Not know</b>                                          | 65(11.07)       | 63(10.73)       | 53(9.03)        | 36(6.13)        | 53(9.03)        |         |
| <b>Moderate and vigorous physical activities, hr/wk</b>             | 6(3,12)         | 7(4,13)         | 7(4,12)         | 9(5,14)         | 10(6,15)        | <.0001  |
| <b>Fever in last 3 months, N (%)</b>                                | 61(10.39)       | 50(8.52)        | 40(6.81)        | 41(6.98)        | 47(8.01)        | 0.16    |
| <b>Self-reported history of reproductive diseases, N (%)</b>        | 104(17.72)      | 116(19.76)      | 122(20.78)      | 129(21.98)      | 134(22.83)      | 0.22    |
| <b>Self-reported history of reproductive surgery, N (%)</b>         | 62(10.56)       | 57(9.71)        | 75(12.78)       | 72(12.27)       | 66(11.24)       | 0.46    |
| <b>Self-reported history of STDs, N (%)</b>                         | 84(14.31)       | 68(11.58)       | 60(10.22)       | 60(10.22)       | 61(10.39)       | 0.13    |
| <b>Use of muscle-enhancing products in the last 3 months, N (%)</b> | 138(23.55)      | 136(23.41)      | 119(20.45)      | 168(28.72)      | 191(32.54)      | <.0001  |
| <b>Abstinence time, hours</b>                                       | 62(58,84)       | 61(55,82)       | 62(58,84)       | 62(58,85)       | 61(57,84)       | 0.009   |
| <b>Sample collected during warm season, N (%)</b>                   | 201(34.24)      | 184(31.35)      | 198(33.73)      | 196(33.39)      | 171(29.13)      | 0.31    |
| <b>Time of day of sample collection, hour</b>                       | 10(9,11)        | 10(10,11)       | 10(9,11)        | 10(9,10)        | 10(9,11)        | 0.33    |
| <b>Time to semen analysis, min</b>                                  | 30(23,40)       | 30(20,45)       | 30(22,50)       | 30(20,45)       | 30(20,50)       | 0.11    |
| <b>Total energy intake, Kcal/day</b>                                | 1637(1260,2201) | 1749(1402,2176) | 1921(1543,2357) | 2116(1751,2553) | 2596(2021,3257) | <.0001  |
| <b>Dietary protein (% of energy)</b>                                | 18(16,21)       | 17(16,20)       | 17(15,20)       | 17(15,19)       | 17(15,19)       | <.0001  |
| Total protein, g/day                                                | 89(79,100)      | 86(78,97)       | 86(77,98)       | 87(78,98)       | 86(78,98)       | 0.07    |
| <b>Total dietary fat (% of energy)</b>                              | 34(31,38)       | 34(30,38)       | 33(29,37)       | 33(29,37)       | 34(29,38)       | <.0001  |
| Total fat, g/day                                                    | 76(68,85)       | 75(67,85)       | 74(64,82)       | 73(64,81)       | 75(65,84)       | <.0001  |
| <b>Saturated dietary fat (% of energy)</b>                          | 13(12,15)       | 13(12,15)       | 13(11,15)       | 13(11,15)       | 13(11,15)       | 0.010   |
| Saturated fatty acids, g/day                                        | 30(26,34)       | 30(26,34)       | 29(25,33)       | 29(25,33)       | 29(25,33)       | 0.001   |
| <b>Monounsaturated dietary fat (% of energy)</b>                    | 12(11,13)       | 12(10,13)       | 12(10,13)       | 11(10,13)       | 12(10,13)       | 0.0001  |

|                                                                    |                 |                 |                 |                 |                 |        |
|--------------------------------------------------------------------|-----------------|-----------------|-----------------|-----------------|-----------------|--------|
| Mono-unsaturated fatty acids, g/day                                | 27(23,30)       | 26(23,30)       | 26(22,29)       | 25(22,28)       | 26(23,30)       | <.0001 |
| <b>Polyunsaturated dietary fat (% of energy)</b>                   | 5(5,6)          | 5(4,6)          | 5(4,5)          | 5(4,6)          | 5(4,6)          | <.0001 |
| Poly-unsaturated fatty acids, g/day                                | 11(10,13)       | 11(10,13)       | 11(10,12)       | 11(10,12)       | 11(10,13)       | 0.0002 |
| Eicosapentaenoic acid (EPA) and Docosahexaenoic acid (DHA), mg/day | 400(241,678)    | 415(248,642)    | 400(243,626)    | 390(229,658)    | 376(218,720)    | 0.63   |
| N3 Poly unsaturated fatty acids, g/day                             | 2(2,2)          | 2(2,3)          | 2(2,2)          | 2(2,3)          | 2(2,3)          | 0.27   |
| N6 Poly unsaturated fatty acids, g/day                             | 9(8,10)         | 8(8,9)          | 8(7,9)          | 8(7,9)          | 9(7,10)         | 0.002  |
| <b>Dietary carbohydrate (% of energy)</b>                          | 46(41,51)       | 48(43,52)       | 49(44,54)       | 49(44,54)       | 49(44,53)       | <.0001 |
| Total carbohydrates, g/day                                         | 231(206,255)    | 239(215,261)    | 243(219,269)    | 245(222,268)    | 241(218,265)    | <.0001 |
| Total fiber, g/day                                                 | 16(12,20)       | 18(13,22)       | 19(14,24)       | 20(16,25)       | 20(15,25)       | <.0001 |
| Total sugar, g/day                                                 | 82(61,102)      | 81(64,103)      | 83(64,108)      | 81(63,102)      | 78(60,99)       | 0.02   |
| Added sugar, g/day                                                 | 38(22,55)       | 35(23,54)       | 34(21,54)       | 33(20,51)       | 30(18,50)       | 0.0002 |
| Carotenoids, ug /day                                               | 2352(1215,4603) | 2005(1161,4091) | 2080(1114,4107) | 1937(1084,3667) | 1985(1013,3860) | 0.004  |
| Retinol, ug/day                                                    | 696(556,960)    | 711(547,1001)   | 709(543,957)    | 745(558,1096)   | 777(527,1201)   | 0.02   |
| Vitamin B6, mg /day                                                | 1(1,2)          | 1(1,2)          | 1(1,2)          | 1(1,2)          | 1(1,2)          | 0.02   |
| Folic acid, ug /day                                                | 240(199,292)    | 247(212,291)    | 244(213,287)    | 250(215,297)    | 250(216,293)    | 0.05   |
| Vitamin B12, ug /day                                               | 6(5,8)          | 6(5,8)          | 6(5,8)          | 6(5,8)          | 7(5,9)          | 0.05   |
| Vitamin C, mg /day                                                 | 67(51,91)       | 65(50,84)       | 63(46,83)       | 63(48,83)       | 64(49,80)       | 0.02   |
| Vitamin D, ug /day                                                 | 5(3,7)          | 4(3,6)          | 4(3,6)          | 4(3,6)          | 4(3,6)          | 0.01   |
| Vitamin E, α-TE /day                                               | 6(5,7)          | 6(5,7)          | 6(5,7)          | 6(5,6)          | 6(5,7)          | <.0001 |
| Vitamin B2, mg /day                                                | 2(1,2)          | 2(1,2)          | 2(1,2)          | 2(1,2)          | 2(1,2)          | <.0001 |
| Sodium, mg /day                                                    | 2783(2474,3096) | 2895(2562,3217) | 2925(2570,3229) | 2998(2645,3280) | 3098(2701,3501) | <.0001 |
| Potassium, mg /day                                                 | 2711(2376,3090) | 2737(2412,3103) | 2767(2438,3172) | 2805(2499,3152) | 2770(2453,3142) | 0.03   |
| Iron, mg /day                                                      | 10(9,11)        | 10(9,11)        | 10(9,11)        | 10(9,11)        | 11(9,11)        | <.0001 |
| Calcium, mg /day                                                   | 881(688,1146)   | 944(740,1231)   | 1021(763,1276)  | 971(757,1230)   | 955(743,1231)   | <.0001 |
| Zinc, mg /day                                                      | 11(10,12)       | 11(10,12)       | 11(10,12)       | 11(10,13)       | 12(10,13)       | <.0001 |

eTable 2: Panel E. Demographic characteristics according to adherence to data-derived “Vegetarian-like” diet Pattern among 2935 Danish young men (2008-2017).

| Quintiles                                | Q1              | Q2              | Q3              | Q4              | Q5              | P-Value |
|------------------------------------------|-----------------|-----------------|-----------------|-----------------|-----------------|---------|
| <b>Men, N</b>                            | 587             | 587             | 587             | 587             | 587             |         |
| <b>Age, years</b>                        | 19(19,19)       | 19(19,20)       | 19(19,20)       | 19(19,19)       | 19(19,20)       | <.0001  |
| <b>Body mass index, Kg/m<sup>2</sup></b> | 23(21,25)       | 22(20,24)       | 22(21,24)       | 22(20,24)       | 22(20,24)       | <.0001  |
| <b>Height, m</b>                         | 1.82(1.77,1.86) | 1.81(1.77,1.87) | 1.82(1.77,1.87) | 1.82(1.78,1.87) | 1.82(1.77,1.87) | 0.81    |
| <b>Cigarettes smoking, N (%)</b>         |                 |                 |                 |                 |                 | 0.15    |
| <b>Daily</b>                             | 159(27.09)      | 175(29.81)      | 137(23.34)      | 163(27.77)      | 153(26.06)      |         |
| <b>Occasionally</b>                      | 137(23.34)      | 140(23.85)      | 128(21.81)      | 128(21.81)      | 150(25.55)      |         |
| <b>Never</b>                             | 291(49.57)      | 272(46.34)      | 322(54.86)      | 296(50.43)      | 284(48.38)      |         |

|                                                                     |                 |                 |                 |                 |                 |        |
|---------------------------------------------------------------------|-----------------|-----------------|-----------------|-----------------|-----------------|--------|
| <b>Marijuana smoking, N (%)</b>                                     |                 |                 |                 |                 |                 | 0.13   |
| <b>Daily</b>                                                        | 20(3.41)        | 19(3.24)        | 24(4.09)        | 18(3.07)        | 29(4.94)        |        |
| <b>Occasionally</b>                                                 | 190(32.37)      | 194(33.05)      | 183(31.18)      | 198(33.73)      | 224(38.16)      |        |
| <b>Never</b>                                                        | 377(64.22)      | 374(63.71)      | 380(64.74)      | 371(63.2)       | 334(56.9)       |        |
| <b>Other recreational drug use, N (%)</b>                           | 72(12.27)       | 77(13.12)       | 52(8.86)        | 70(11.93)       | 74(12.61)       | 0.17   |
| <b>Education of the mother</b>                                      |                 |                 |                 |                 |                 | 0.001  |
| <b>&lt; 9 years</b>                                                 | 14(2.39)        | 18(3.07)        | 23(3.92)        | 17(2.9)         | 20(3.41)        |        |
| <b>9-10 years</b>                                                   | 160(27.26)      | 181(30.83)      | 137(23.34)      | 146(24.87)      | 101(17.21)      |        |
| <b>&gt; 11 years</b>                                                | 325(55.37)      | 304(51.79)      | 328(55.88)      | 335(57.07)      | 373(63.54)      |        |
| <b>Other</b>                                                        | 34(5.79)        | 37(6.3)         | 43(7.33)        | 38(6.47)        | 31(5.28)        |        |
| <b>Missing/do Not know</b>                                          | 54(9.2)         | 47(8.01)        | 56(9.54)        | 51(8.69)        | 62(10.56)       |        |
| <b>Moderate and vigorous physical activities, hr/wk</b>             | 9(4,15)         | 8(4,14)         | 8(4,13)         | 8(4,13)         | 8(4,14)         | 0.23   |
| <b>Fever in last 3 months, N (%)</b>                                | 46(7.84)        | 47(8.01)        | 47(8.01)        | 59(10.05)       | 40(6.81)        | 0.36   |
| <b>Self-reported history of reproductive diseases, N (%)</b>        | 127(21.64)      | 102(17.38)      | 128(21.81)      | 130(22.15)      | 118(20.1)       | 0.23   |
| <b>Self-reported history of reproductive surgery, N (%)</b>         | 64(10.9)        | 67(11.41)       | 78(13.29)       | 70(11.93)       | 53(9.03)        | 0.23   |
| <b>Self-reported history of STDs, N (%)</b>                         | 72(12.27)       | 55(9.37)        | 61(10.39)       | 75(12.78)       | 70(11.93)       | 0.32   |
| <b>Use of muscle-enhancing products in the last 3 months, N (%)</b> | 211(35.95)      | 161(27.62)      | 141(24.06)      | 130(22.22)      | 109(18.79)      | <.0001 |
| <b>Abstinence time, hours</b>                                       | 62(58,84)       | 61(56,83)       | 62(58,83)       | 61(57,83)       | 62(56,85)       | 0.12   |
| <b>Sample collected during warm season, N (%)</b>                   | 187(31.86)      | 191(32.54)      | 185(31.52)      | 196(33.39)      | 191(32.54)      | 0.97   |
| <b>Time of day of sample collection, hour</b>                       | 10(9,11)        | 10(9,11)        | 10(9,11)        | 10(9,11)        | 10(10,11)       | 0.21   |
| <b>Time to semen analysis, min</b>                                  | 30(25,45)       | 30(20,45)       | 30(20,45)       | 30(20,45)       | 30(25,45)       | 0.31   |
| <b>Total energy intake, Kcal/day</b>                                | 2050(1610,2621) | 1881(1450,2334) | 1949(1483,2521) | 1979(1535,2522) | 2118(1629,2655) | <.0001 |
| <b>Dietary protein (% of energy)</b>                                | 18(16,21)       | 18(16,20)       | 17(15,19)       | 17(15,19)       | 17(15,19)       | <.0001 |
| Total protein, g/day                                                | 92(83,105)      | 89(79,99)       | 86(77,95)       | 85(76,96)       | 85(76,94)       | <.0001 |
| <b>Total dietary fat (% of energy)</b>                              | 35(30,38)       | 33(29,38)       | 33(30,37)       | 33(30,37)       | 33(29,37)       | 0.002  |
| Total fat, g/day                                                    | 77(67,85)       | 74(65,84)       | 74(66,83)       | 74(66,82)       | 73(64,82)       | 0.002  |
| <b>Saturated dietary fat (% of energy)</b>                          | 13(12,15)       | 13(11,15)       | 13(11,15)       | 13(12,15)       | 13(11,15)       | 0.31   |
| Saturated fatty acids, g/day                                        | 30(26,34)       | 29(25,34)       | 29(25,34)       | 29(26,34)       | 29(25,33)       | 0.32   |
| <b>Monounsaturated dietary fat (% of energy)</b>                    | 12(11,14)       | 12(10,13)       | 12(10,13)       | 12(10,13)       | 11(10,13)       | <.0001 |
| Mono-unsaturated fatty acids, g/day                                 | 27(24,31)       | 26(22,30)       | 26(23,29)       | 26(22,29)       | 25(22,29)       | <.0001 |
| <b>Polyunsaturated dietary fat (% of energy)</b>                    | 5(5,6)          | 5(4,6)          | 5(4,6)          | 5(4,6)          | 5(4,6)          | 0.007  |
| Poly-unsaturated fatty acids, g/day                                 | 11(10,13)       | 11(10,13)       | 11(10,12)       | 11(10,12)       | 11(10,12)       | 0.005  |
| Eicosapentaenoic acid (EPA) and Docosahexaenoic acid (DHA), mg/day  | 357(211,613)    | 394(238,647)    | 406(239,685)    | 405(250,650)    | 405(243,722)    | 0.03   |
| N3 Poly unsaturated fatty acids, g/day                              | 2(2,3)          | 2(2,3)          | 2(2,3)          | 2(2,3)          | 2(2,3)          | 0.98   |
| N6 Poly unsaturated fatty acids, g/day                              | 9(8,10)         | 8(7,9)          | 8(8,9)          | 8(7,9)          | 8(7,9)          | <.0001 |
| <b>Dietary carbohydrate (% of energy)</b>                           | 45(41,51)       | 48(42,53)       | 48(44,53)       | 49(44,53)       | 49(44,54)       | <.0001 |
| Total carbohydrates, g/day                                          | 227(203,252)    | 239(214,264)    | 243(221,264)    | 243(222,267)    | 246(220,271)    | <.0001 |
| Total fiber, g/day                                                  | 18(13,22)       | 19(14,24)       | 18(14,24)       | 19(15,24)       | 19(14,24)       | 0.001  |

|                      |                 |                 |                 |                 |                 |        |
|----------------------|-----------------|-----------------|-----------------|-----------------|-----------------|--------|
| Total sugar, g/day   | 74(56,96)       | 79(60,103)      | 82(63,103)      | 84(66,104)      | 87(67,107)      | <.0001 |
| Added sugar, g/day   | 28(16,46)       | 32(19,51)       | 35(22,52)       | 36(23,55)       | 40(25,59)       | <.0001 |
| Carotenoids, ug /day | 1661(890,3028)  | 1862(1033,3668) | 1982(1087,3774) | 2189(1226,4430) | 2879(1387,5671) | <.0001 |
| Retinol, ug/day      | 709(535,972)    | 745(548,1053)   | 730(565,1030)   | 746(555,1072)   | 686(538,1004)   | 0.14   |
| Vitamin B6, mg /day  | 1(1,2)          | 1(1,2)          | 1(1,2)          | 1(1,1)          | 1(1,1)          | <.0001 |
| Folic acid, ug /day  | 232(200,274)    | 242(206,284)    | 244(210,291)    | 251(220,297)    | 264(225,314)    | <.0001 |
| Vitamin B12, ug /day | 7(5,8)          | 6(5,8)          | 6(5,8)          | 6(5,8)          | 6(5,8)          | 0.001  |
| Vitamin C, mg /day   | 62(48,81)       | 64(48,82)       | 63(49,85)       | 65(50,83)       | 68(50,88)       | 0.02   |
| Vitamin D, ug /day   | 4(3,6)          | 5(3,6)          | 5(3,7)          | 4(3,6)          | 4(3,6)          | 0.95   |
| Vitamin E, α-TE /day | 6(5,7)          | 6(5,7)          | 6(5,7)          | 6(5,7)          | 6(5,7)          | 0.0005 |
| Vitamin B2, mg /day  | 2(1,2)          | 2(1,2)          | 2(1,2)          | 2(1,2)          | 2(1,2)          | 0.14   |
| Sodium, mg /day      | 2976(2625,3306) | 2951(2514,3341) | 2920(2554,3235) | 2941(2641,3215) | 2882(2549,3234) | 0.05   |
| Potassium, mg /day   | 2775(2438,3119) | 2743(2414,3118) | 2688(2401,3112) | 2738(2423,3167) | 2833(2501,3163) | 0.003  |
| Iron, mg /day        | 10(9,11)        | 10(9,11)        | 10(9,11)        | 10(9,11)        | 10(9,12)        | 0.48   |
| Calcium, mg /day     | 954(703,1257)   | 932(741,1222)   | 955(735,1181)   | 949(741,1260)   | 944(764,1193)   | 0.57   |
| Zinc, mg /day        | 12(11,13)       | 11(10,13)       | 11(10,12)       | 11(10,12)       | 11(10,12)       | <.0001 |

Abbreviations: N; number of men, m; meters, hr; hours, wk; week, STDs; sexually transmitted Diseases, α-TE ; alpha-tocopherol equivalents.

Numbers shown are median and interquartile range unless noted as N(%).

Warm season: April through September.

Reproductive diseases include self-reported history of varicocele, cryptorchidism, testicular mumps, inguinal hernia, testicular injury (hit, kicked or otherwise injured so it caused swelling of the scrotum), hydrocele, testicular torsion, hypospadias, epididymo-orchites, cystitis or prostatitis.

Reproductive surgeries include self-reported history of surgery for inguinal hernia, varicocele, hydrocele, testicular torsion, hypospadias, testicular cancer, phimosis, testicular biopsy, vasectomy, re-fertilization, and other reproductive surgeries.

STDs included self-reported history of gonorrhea, chlamydia, and other venereal diseases.

All nutrients' intakes were adjusted for energy intake using the residual method making nutrient intake independent from energy intake.

P-values were estimated based on Chi-square test for categorical variables and Kruskal-Wallis test for continuous variables to test for differences in demographic and nutritional characteristics across quintiles of adherence within each pattern.

**eTable 3. Food Group Loadings for 2 Dietary Patterns Identified From Food-Frequency Questionnaire**

| Rotated Factor Pattern | “Western”<br>Pattern |   | “Prudent”<br>Pattern |   | “Open-Sandwich”<br>Pattern |   | “Vegetarian-like”<br>Pattern |   |
|------------------------|----------------------|---|----------------------|---|----------------------------|---|------------------------------|---|
| Pizza                  | 64                   | * | -5                   |   | -8                         |   | -8                           |   |
| French Fries           | 61                   | * | -3                   |   | 3                          |   | -6                           |   |
| Warm Processed Meat    | 58                   | * | 3                    |   | 3                          |   | -8                           |   |
| Warm Red Meat          | 55                   | * | 31                   |   | 12                         |   | -32                          |   |
| Snacks                 | 52                   | * | 2                    |   | 2                          |   | 10                           |   |
| Dairy Based Sauces     | 49                   | * | 8                    |   | 20                         |   | -2                           |   |
| Potatoes               | 48                   | * | 16                   |   | 41                         | * | 5                            |   |
| High Energy Drinks     | 47                   | * | -27                  |   | 10                         |   | 8                            |   |
| Sweets Desserts        | 37                   |   | -7                   |   | 5                          |   | 16                           |   |
| Refined Grains         | 31                   |   | -1                   |   | 24                         |   | 8                            |   |
| Warm Organ Meat        | 30                   |   | 19                   |   | 3                          |   | 17                           |   |
| Energy Drink           | 29                   |   | -18                  |   | 2                          |   | 11                           |   |
| Fruit Juices           | 18                   |   | 7                    |   | 16                         |   | 16                           |   |
| Liquor                 | 14                   |   | 1                    |   | -3                         |   | -23                          |   |
| Beer                   | 13                   |   | -4                   |   | 0                          |   | -4                           |   |
| Cocktails              | 10                   |   | -5                   |   | 3                          |   | -15                          |   |
| Vegetable Salad        | -11                  |   | 65                   | * | 1                          |   | 7                            |   |
| Cooked Vegetable Side  | -11                  |   | 65                   | * | 1                          |   | 14                           |   |
| Warm Fish              | 17                   |   | 53                   | * | 9                          |   | 14                           |   |
| Warm Poultry           | 9                    |   | 51                   | * | -6                         |   | -28                          |   |
| Fruit                  | -22                  |   | 52                   | * | 21                         |   | 17                           |   |
| Nuts                   | 9                    |   | 49                   | * | 2                          |   | 17                           |   |
| Water                  | -16                  |   | 41                   | * | 16                         |   | -1                           |   |
| Cold Eggs              | 10                   |   | 35                   |   | 29                         |   | 7                            |   |
| Cold Cereal            | -14                  |   | 30                   |   | 30                         |   | 9                            |   |
| Wine                   | 2                    |   | 11                   |   | -9                         |   | 10                           |   |
| Cold Processed Meat    | 10                   |   | 5                    |   | 76                         | * | -12                          |   |
| Whole Grains           | -14                  |   | 11                   |   | 68                         | * | 7                            |   |
| Mayonnaise             | 7                    |   | -8                   |   | 54                         | * | -6                           |   |
| Cold Fish              | 18                   |   | 16                   |   | 53                         | * | 6                            |   |
| Condiments             | 8                    |   | 0                    |   | 48                         | * | 24                           |   |
| High Fat Dairy         | 24                   |   | 1                    |   | 40                         |   | 32                           |   |
| Low Fat Dairy          | -4                   |   | 20                   |   | 35                         |   | -17                          |   |
| Low Energy Drinks      | 6                    |   | 1                    |   | 16                         |   | -7                           |   |
| Warm Vegetarian Main   | -5                   |   | 13                   |   | -13                        |   | 64                           | * |
| Tea                    | 8                    |   | -3                   |   | 3                          |   | 41                           | * |
| Soymilk                | -3                   |   | 4                    |   | 0                          |   | 39                           |   |
| Warm Eggs              | 29                   |   | 24                   |   | 0                          |   | 37                           |   |
| Tomatoes               | 18                   |   | 17                   |   | 10                         |   | 37                           |   |
| Coffee                 | 4                    |   | 3                    |   | 1                          |   | 23                           |   |

Printed values are multiplied by 100 and rounded to the nearest integer.

Values greater than 0.4 are flagged by an ‘\*’.

eTable 4. Summary of the Distribution of Reproductive Parameters

| Reproductive Parameter                            | N    | Median (95% CI)  | Mean (SD)  | % < WHO lower limits | % Intermediate semen quality | % ≥ High semen quality (Damsgaard) |
|---------------------------------------------------|------|------------------|------------|----------------------|------------------------------|------------------------------------|
| Semen volume, mL                                  | 2798 | 3.2 (3.2,3.3)    | 3.4 (1.5)  | 6                    | -                            | -                                  |
| Sperm concentration, million/mL                   | 2798 | 44 (42,46)       | 57(50)     | 17                   | 28                           | 55                                 |
| Total sperm count, million                        | 2798 | 140 (133,146)    | 183(165)   | 15                   | -                            | -                                  |
| Motile spermatozoa, %                             | 2798 | 69 (68,70)       | 66 (16)    | 8                    | 6                            | 87                                 |
| Total motile sperm count, million                 | 2798 | 14 (13, 14)      | 127 (119)  | -                    | -                            | -                                  |
| Progressively motile spermatozoa, %               | 2798 | 61 (60,62)       | 58 (17)    | 8                    | -                            | -                                  |
| Total progressively motile sperm count, million   | 2798 | 82 (77, 86)      | 113(109)   | -                    | -                            | -                                  |
| Normal sperm morphology, %                        | 2798 | 6.5 (6.5,7.0)    | 7.2 (4.6)  | 25                   | 41                           | 34                                 |
| Total normal morphologically sperm count, million | 2798 | 9 (8,9)          | 16(20)     | -                    | -                            | -                                  |
| Testicular volume by ultrasound, mean (mL)        | 2798 | 13.5 (13.3,13.7) | 13.8 (3.8) | -                    | -                            | -                                  |
| Total testosterone, nmol/L                        | 2734 | 18 (18,18)       | 19 (6)     | -                    | -                            | -                                  |
| Free testosterone, pmol/L                         | 2734 | 445 (441,453)    | 468(154)   | -                    | -                            | -                                  |
| Estradiol, pmol/l                                 | 2734 | 82 (81,83)       | 85(30)     | -                    | -                            | -                                  |
| LH, IU/L                                          | 2734 | 3.3 (3.3,3.4)    | 3.6 (1.6)  | -                    | -                            | -                                  |
| FSH, IU/L                                         | 2734 | 2.6 (2.5,2.7)    | 3.0(1.9)   | -                    | -                            | -                                  |
| SHBG, Nmol/L                                      | 2734 | 28 (28,29)       | 30 (11)    | -                    | -                            | -                                  |
| Inhibin-B, pg/mL                                  | 2734 | 168 (166,170)    | 174 (61)   | -                    | -                            | -                                  |
| Inhibin-B/ FSH                                    | 2734 | 65(63,69)        | 99 (507)   | -                    | -                            | -                                  |
| Total Testosterone/ LH                            | 2734 | 6(5,6)           | 6(10)      | -                    | -                            | -                                  |
| Free Testosterone/ LH                             | 2734 | 135(133,137)     | 159 (463)  | -                    | -                            | -                                  |
| Estradiol/ Total Testosterone                     | 2734 | 4(4,4)           | 5 (2)      | -                    | -                            | -                                  |
| <b>(Estradiol/ Free Testosterone) *100</b>        | 2734 | 18(18,18)        | 19(7)      | -                    | -                            | -                                  |

Abbreviations: N; number of men, 95% CI; 95% confidence intervals, SD; standard deviation, WHO; world health organization. WHO lower reference limits are < 1.5 mL semen volume, <15 million/mL sperm concentration, < 39 million total sperm count, <40 % motile spermatozoa, <32 % progressively motile spermatozoa, and < 4% normal sperm morphology. Damsgaard reference limits: ≥40 mill/ml sperm concentration, ≥50% motile spermatozoa, and ≥9% normal sperm morphology. Intermediate semen quality: between the WHO lower reference limits and Damsgaard reference limits.

**eTable 5. Unadjusted Medians in Serum Concentrations of Reproductive Hormones on the Scale for the Individual Hormones as Stated in the Table According to Adherence to Data-Derived Dietary Patterns**

|                 | Reproductive Parameters | Total Testosterone, nmol/L | Free Testosterone, pmol/L | Estradiol, pg/mL | LH, IU/L      | Inhibin-B, pg/mL | FSH, IU/L     | SHBG, nmol/L | Inhibin-B/FSH | Total Testosterone/LH | Free Testosterone/LH | Estradiol/Total Testosterone | (Estradiol/Free Testosterone)*100 |
|-----------------|-------------------------|----------------------------|---------------------------|------------------|---------------|------------------|---------------|--------------|---------------|-----------------------|----------------------|------------------------------|-----------------------------------|
| "Western"       | Q1                      | 17 (17,18)                 | 415 (405,426)             | 80 (78,83)       | 3.3 (3.2,3.4) | 171 (166,175)    | 2.5 (2.4,2.7) | 28 (27,29)   | 71 (61,77)    | 6 (5,6)               | 127 (122,133)        | 5 (4,5)                      | 19 (18,19)                        |
|                 | Q2                      | 18 (17,18)                 | 437 (426,446)             | 80 (78,84)       | 3.4 (3.2,3.6) | 165 (161,171)    | 2.6 (2.5,2.8) | 28 (27,29)   | 65 (59,70)    | 5 (5,6)               | 133 (126,137)        | 4 (4,5)                      | 19 (18,19)                        |
|                 | Q3                      | 18 (18,19)                 | 451 (438,463)             | 82 (80,86)       | 3.3 (3.1,3.5) | 177 (170,181)    | 2.6 (2.4,2.7) | 27 (27,29)   | 73 (65,80)    | 6 (5,6)               | 135 (130,142)        | 4 (4,5)                      | 18 (17,19)                        |
|                 | Q4                      | 19 (18,19)                 | 458 (442,470)             | 82 (80,84)       | 3.4 (3.3,3.5) | 169 (163,174)    | 2.7 (2.5,2.8) | 29 (28,30)   | 62 (57,68)    | 6 (5,6)               | 135 (130,142)        | 4 (4,4)                      | 18 (17,18)                        |
|                 | Q5                      | 19 (19,20)                 | 473 (462,489)             | 83 (81,87)       | 3.4 (3.3,3.5) | 160 (154,166)    | 2.6 (2.4,2.8) | 28 (27,29)   | 62 (57,67)    | 6 (6,6)               | 143 (136,148)        | 4 (4,4)                      | 17 (17,18)                        |
|                 | P trend                 | <0.0001                    | <0.0001                   | 0.11             | 0.25          | 0.004            | 0.35          | 0.92         | 0.008         | 0.05                  | 0.003                | 0.002                        | <0.0001                           |
| "Prudent"       | Q1                      | 19 (18,19)                 | 459 (445,473)             | 85 (83,88)       | 3.4 (3.3,3.5) | 166 (160,171)    | 2.5 (2.4,2.7) | 28 (27,29)   | 66 (63,72)    | 6 (5,6)               | 133 (126,140)        | 4 (4,4)                      | 18 (17,18)                        |
|                 | Q2                      | 18 (18,19)                 | 451 (438,464)             | 82 (80,85)       | 3.4 (3.3,3.6) | 167 (163,172)    | 2.7 (2.5,2.9) | 28 (27,29)   | 63 (57,70)    | 5 (5,6)               | 134 (129,139)        | 4 (4,5)                      | 18 (17,19)                        |
|                 | Q3                      | 18 (18,19)                 | 439 (427,454)             | 81 (79,83)       | 3.2 (3.1,3.4) | 175 (170,183)    | 2.4 (2.3,2.6) | 28 (27,29)   | 75 (69,80)    | 6 (6,6)               | 140 (134,146)        | 4 (4,5)                      | 18 (17,19)                        |
|                 | Q4                      | 18 (18,19)                 | 445 (437,457)             | 80 (78,83)       | 3.4 (3.2,3.5) | 167 (162,173)    | 2.7 (2.5,2.9) | 28 (27,29)   | 61 (56,69)    | 6 (5,6)               | 133 (127,137)        | 4 (4,5)                      | 18 (18,19)                        |
|                 | Q5                      | 18 (17,18)                 | 435 (420,451)             | 80 (78,84)       | 3.3 (3.2,3.5) | 166 (161,171)    | 2.6 (2.6,2.9) | 30 (28,31)   | 60 (56,69)    | 6 (5,6)               | 135 (129,141)        | 4 (4,5)                      | 18 (18,19)                        |
|                 | P trend                 | 0.03                       | 0.03                      | 0.01             | 0.67          | 0.90             | 0.11          | 0.02         | 0.05          | 0.87                  | 0.69                 | 0.37                         | 0.73                              |
| "Open-Sandwich" | Q1                      | 18 (18,19)                 | 456 (440,465)             | 83 (80,85)       | 3.3 (3.2,3.4) | 170 (165,177)    | 2.6 (2.4,2.7) | 27 (26,28)   | 66 (61,74)    | 6 (5,6)               | 141 (137,148)        | 4 (4,5)                      | 18 (17,19)                        |
|                 | Q2                      | 18 (18,19)                 | 455 (441,471)             | 82 (80,86)       | 3.3 (3.2,3.5) | 166 (161,172)    | 2.6 (2.5,2.8) | 28 (27,29)   | 67 (61,71)    | 6 (5,6)               | 140 (135,146)        | 4 (4,5)                      | 18 (17,19)                        |
|                 | Q3                      | 18 (18,19)                 | 445 (435,456)             | 81 (79,84)       | 3.3 (3.2,3.5) | 173 (167,180)    | 2.5 (2.4,2.7) | 28 (27,29)   | 68 (61,76)    | 6 (5,6)               | 133 (129,137)        | 4 (4,5)                      | 18 (17,19)                        |
|                 | Q4                      | 18 (18,19)                 | 435 (425,452)             | 82 (79,84)       | 3.4 (3.3,3.6) | 169 (165,175)    | 2.6 (2.4,2.7) | 29 (28,30)   | 65 (60,72)    | 6 (5,6)               | 132 (125,135)        | 4 (4,5)                      | 18 (18,19)                        |
|                 | Q5                      | 18 (18,19)                 | 441 (428,453)             | 82 (79,84)       | 3.4 (3.3,3.6) | 163 (156,168)    | 2.7 (2.5,2.9) | 29 (28,31)   | 62 (57,66)    | 5 (5,6)               | 129 (124,136)        | 4 (4,4)                      | 18 (17,19)                        |
|                 | P trend                 | 0.10                       | 0.31                      | 0.85             | 0.05          | 0.02             | 0.26          | 0.01         | 0.21          | 0.38                  | 0.0002               | 0.004                        | 0.74                              |

|                   |         |               |               |            |                  |                  |                  |            |            |         |                  |         |            |
|-------------------|---------|---------------|---------------|------------|------------------|------------------|------------------|------------|------------|---------|------------------|---------|------------|
| "Vegetarian-like" | Q1      | 18(17,18)     | 444 (433,455) | 82 (79,86) | 3.4<br>(3.3,3.5) | 168<br>(161,174) | 2.6<br>(2.4,2.7) | 27 (26,28) | 68 (64,73) | 5 (5,6) | 134<br>(128,139) | 5 (4,5) | 19 (18,19) |
|                   | Q2      | 18<br>(18,19) | 453 (438,463) | 83 (80,86) | 3.4<br>(3.3,3.5) | 169<br>(165,175) | 2.6<br>(2.4,2.7) | 28 (27,29) | 66 (60,72) | 6 (5,6) | 135<br>(129,146) | 4 (4,5) | 18 (18,19) |
|                   | Q3      | 18<br>(17,18) | 441 (429,457) | 82 (80,85) | 3.3<br>(3.2,3.5) | 170<br>(165,175) | 2.6<br>(2.5,2.8) | 28 (27,29) | 62 (56,69) | 5 (5,6) | 132<br>(126,136) | 4 (4,5) | 19 (18,19) |
|                   | Q4      | 18<br>(18,19) | 448 (432,459) | 82 (79,86) | 3.4<br>(3.3,3.5) | 170<br>(164,177) | 2.6<br>(2.5,2.7) | 29 (28,30) | 65 (59,76) | 6 (5,6) | 135<br>(130,141) | 4 (4,4) | 18 (17,18) |
|                   | Q5      | 19<br>(18,20) | 449 (435,468) | 80 (77,83) | 3.3<br>(3.1,3.4) | 165<br>(162,169) | 2.6<br>(2.4,2.7) | 29 (28,31) | 65 (60,70) | 6 (6,6) | 139<br>(133,148) | 4 (4,4) | 17 (17,18) |
|                   | P trend | 0.0002        | 0.61          | 0.18       | 0.49             | 0.17             | 0.81             | 0.002      | 0.29       | 0.003   | 0.26             | <0.0001 | 0.001      |

Abbreviations: Q; quintile, 95% CI; 95% confidence intervals, LH; Luteinizing Hormone, FSH; Follicle stimulating hormone, SHBG; Sex Hormone Binding Globulin.



**eTable 6. Adjusted Median Differences in Semen Quality Parameters According to Adherence to Data-Derived Dietary Patterns**

| Reproductive Parameters   |         | Semen volume, mL | Sperm concentration, million/mL | Total sperm count, million | Motile spermatozoa, % | Total motile sperm count, million | Progressively motile spermatozoa, % | Total progressively motile sperm count, million | Normal sperm morphology, % | Total normal morphologically sperm count, million |
|---------------------------|---------|------------------|---------------------------------|----------------------------|-----------------------|-----------------------------------|-------------------------------------|-------------------------------------------------|----------------------------|---------------------------------------------------|
| "Western" Pattern         | Q1      | Ref              | Ref                             | Ref                        | Ref                   | Ref                               | Ref                                 | Ref                                             | Ref                        | Ref                                               |
|                           | Q2      | -0.1 (-0.3,0.0)  | -1.8 (-6.9,3.4)                 | -10 (-26,5)                | 0.1 (-1.8,1.9)        | -6 (-16,5)                        | -0.1 (-2.2,2.0)                     | -4 (-15,7)                                      | 0.2 (-0.5,0.8)             | -1 (-3,0)                                         |
|                           | Q3      | -0.3 (-0.4,-0.1) | 1.1 (-4.9,7.2)                  | -18 (-33,-3)               | 1.1 (-0.3,2.5)        | -11 (-23,1)                       | 0.2 (-2.0,2.3)                      | -10 (-21,2)                                     | 0.0 (-0.6,0.7)             | -2 (-3,0)                                         |
|                           | Q4      | -0.3 (-0.4,-0.2) | -0.9 (-6.6,4.8)                 | -12 (-26,2)                | -0.5 (-2.5,1.6)       | -10 (-21,1)                       | -0.7 (-3.1,1.7)                     | -12 (-24,0)                                     | -0.4 (-0.9,0.2)            | -2 (-4,0)                                         |
|                           | Q5      | -0.3 (-0.5,-0.1) | -2.3 (-8.6,4.0)                 | -26 (-42,-9)               | 1.4 (-0.2,3.1)        | -17 (-28,-5)                      | -0.3 (-2.6,1.9)                     | -15 (-27,-3)                                    | -0.3 (-0.9,0.4)            | -2 (-4,-1)                                        |
|                           | P trend | 0.002            | 0.42                            | 0.005                      | 0.32                  | 0.05                              | 0.44                                | 0.02                                            | 0.10                       | 0.02                                              |
| "Prudent" Pattern         | Q1      | Ref              | Ref                             | Ref                        | Ref                   | Ref                               | Ref                                 | Ref                                             | Ref                        | Ref                                               |
|                           | Q2      | 0.0 (-0.1,0.2)   | 4.2 (-1.3,9.6)                  | 9 (-7,25)                  | -1.0 (-3.1,1.1)       | 12 (-1,24)                        | -1.7 (-4.2,0.8)                     | 9 (-1,20)                                       | -0.3 (-0.9,0.3)            | 0 (-2,1)                                          |
|                           | Q3      | 0.1 (-0.1,0.2)   | 3.3 (-1.8,8.4)                  | 14 (-1,30)                 | -1.3 (-3.4,0.7)       | 10 (0,20)                         | -2.1 (-4.4,0.2)                     | 8 (0,17)                                        | 0.2 (-0.5,0.8)             | 1 (-1,2)                                          |
|                           | Q4      | 0.1 (-0.1,0.3)   | 6.7 (0.7,12.6)                  | 27 (12,43)                 | -0.9 (-3.0,1.1)       | 19 (8,30)                         | -1.0 (-3.2,1.1)                     | 18 (7,28)                                       | 0.4 (-0.3,1.1)             | 2 (1,4)                                           |
|                           | Q5      | 0.2 (0.0,0.4)    | 6.7 (1.2,12.3)                  | 43 (23,63)                 | -0.1 (-1.7,1.6)       | 30 (16,44)                        | 0.1 (-2.3,2.4)                      | 26 (14,37)                                      | 0.5 (-0.2,1.2)             | 2 (0,4)                                           |
|                           | P trend | 0.003            | 0.08                            | <0.0001                    | 0.39                  | <0.0001                           | 0.88                                | <0.0001                                         | 0.04                       | 0.001                                             |
| "Open-Sandwich" Pattern   | Q1      | Ref              | Ref                             | Ref                        | Ref                   | Ref                               | Ref                                 | Ref                                             | Ref                        | Ref                                               |
|                           | Q2      | 0 (-0.1,0.2)     | -2.6 (-8.4,3.2)                 | -5 (-20,10)                | -0.5 (-2.3,1.3)       | -9 (-19,1)                        | 0.0 (-2.0,1.9)                      | -8 (-17,2)                                      | -0.4 (-1.0,0.2)            | -1 (-2,1)                                         |
|                           | Q3      | -0.2 (-0.3,0)    | 0.1 (-5.8,5.9)                  | -5 (-21,11)                | 2.5 (0.6,4.5)         | -6 (-18,6)                        | 1.7 (-0.4,3.8)                      | -6 (-17,6)                                      | 0.1 (-0.5,0.7)             | 0 (-2,2)                                          |
|                           | Q4      | 0 (-0.2,0.1)     | -2.2 (-7.8,3.3)                 | -3 (-19,13)                | 2.1 (0.5,3.6)         | -5 (-17,7)                        | -0.1 (-2.5,2.4)                     | -5 (-16,7)                                      | 0.1 (-0.5,0.7)             | 0 (-2,2)                                          |
|                           | Q5      | 0 (-0.1,0.2)     | -2.9 (-8.1,2.2)                 | -6 (-24,11)                | 2.3 (0.8,3.9)         | -5 (-17,8)                        | 1.9 (-0.3,4.2)                      | -6 (-18,5)                                      | -0.1 (-0.8,0.6)            | 0 (-2,2)                                          |
|                           | P trend | 0.26             | 0.11                            | 0.68                       | 0.008                 | 0.80                              | 0.39                                | 0.74                                            | 0.74                       | 0.59                                              |
| "Vegetarian-like" Pattern | Q1      | Ref              | Ref                             | Ref                        | Ref                   | Ref                               | Ref                                 | Ref                                             | Ref                        | Ref                                               |
|                           | Q2      | 0 (-0.1,0.2)     | -0.2 (-5.0,4.7)                 | 4 (-9,17)                  | 2.2 (0.0,4.5)         | 6 (-6,18)                         | 1.7 (-0.8,4.1)                      | 5 (-5,16)                                       | 0.7 (0.1,1.3)              | 1 (-1,3)                                          |
|                           | Q3      | 0 (-0.1,0.2)     | -0.9 (-5.9,4.2)                 | 3 (-13,19)                 | 2.3 (0.3,4.3)         | 5 (-7,17)                         | 2.5 (0.2,4.8)                       | 6 (-4,16)                                       | 0.2 (-0.4,0.7)             | 0 (-1,2)                                          |
|                           | Q4      | 0 (-0.2,0.2)     | 5.9 (0.6,11.1)                  | 11 (-4,26)                 | -0.5 (-2.6,1.6)       | 4 (-6,14)                         | 0.4 (-1.9,2.6)                      | 4 (-6,15)                                       | 0.0 (-0.6,0.6)             | 1 (-1,2)                                          |
|                           | Q5      | 0.2 (0.0,0.3)    | 0.4 (-5.1,5.9)                  | 6 (-11,24)                 | 1.1 (-0.9,3.1)        | 7 (-3,17)                         | 1.5 (-1.0,4.0)                      | 9 (-1,19)                                       | 0.8 (0.2,1.4)              | 2 (0,3)                                           |
|                           | P trend | 0.18             | 0.53                            | 0.29                       | 0.95                  | 0.22                              | 0.84                                | 0.30                                            | 0.04                       | 0.18                                              |

Abbreviations: Q; quintile, 95% CI; 95% confidence intervals.

Models were adjusted for age, body mass index, height, smoking, use of marijuana and other recreational drug, moderate-to-vigorous physical activities (hours/ week), history of reproductive diseases, reproductive surgeries, and sexually transmitted diseases, season and calendar year of the sample, mother's education level, total energy intake, and abstinence time. Sperm motility models were further adjusted for time elapsed between specimen collection and analysis.

**eTable 7. Adjusted Probabilities of Semen Quality Parameters Below the WHO Lower Reference Limits According to Adherence to Data-Derived Dietary Patterns**

| Adjusted <sup>1</sup> proportions (95% CI) < WHO Lower Reference Limits per diet pattern quintiles |                      |                                    |                                |                         |                                       |                              |                                            |
|----------------------------------------------------------------------------------------------------|----------------------|------------------------------------|--------------------------------|-------------------------|---------------------------------------|------------------------------|--------------------------------------------|
| Semen Quality Parameters                                                                           | <1.5 mL Semen volume | <15 million/mL Sperm concentration | < 39 million Total sperm count | <40% Motile spermatozoa | <32% Progressively motile spermatozoa | < 4% Normal sperm morphology | Any semen parameter < WHO reference limits |
| <b>“Western” Pattern</b>                                                                           |                      |                                    |                                |                         |                                       |                              |                                            |
| Q1                                                                                                 | 4(3,6)               | 14(12,18)                          | 12(9,15)                       | 6(4,8)                  | 8(6,10)                               | 23(20,27)                    | 37(33,41)                                  |
| Q2                                                                                                 | 5(4,7)               | 16(14,20)                          | 14(12,18)                      | 6(4,8)                  | 7(5,10)                               | 24(20,27)                    | 39(35,43)                                  |
| Q3                                                                                                 | 6(4,8)               | 12(10,15)                          | 11(9,14)                       | 6(5,9)                  | 7(5,10)                               | 23(20,27)                    | 36(32,40)                                  |
| Q4                                                                                                 | 4(3,6)               | 16(13,19)                          | 13(11,16)                      | 5(4,7)                  | 7(5,10)                               | 24(21,28)                    | 37(34,41)                                  |
| Q5                                                                                                 | 6(4,9)               | 19(16,23)                          | 17(14,20)                      | 7(5,9)                  | 8(6,11)                               | 27(24,32)                    | 45(41,49)                                  |
| P trend                                                                                            | 0.28                 | 0.04                               | 0.04                           | 0.77                    | 0.97                                  | 0.10                         | 0.006                                      |
| RR (95%CI) for Q5 compared to Q1                                                                   | 1.5(0.9,2.5)         | 1.3(1,1.7)                         | 1.4(1.0,1.9)                   | 1.1(0.7,1.8)            | 1.0(0.7,1.6)                          | 1.2 (0.9,1.5)                | 1.2 (1.1,1.4)                              |
| <b>“Prudent” Pattern</b>                                                                           |                      |                                    |                                |                         |                                       |                              |                                            |
| Q1                                                                                                 | 7(5,10)              | 16(14,20)                          | 14(11,17)                      | 6(5,9)                  | 7(5,10)                               | 25(22,29)                    | 41(37,45)                                  |
| Q2                                                                                                 | 5(4,8)               | 18(15,21)                          | 15(12,18)                      | 8(6,11)                 | 9(7,12)                               | 25(22,29)                    | 41(37,45)                                  |
| Q3                                                                                                 | 5(3,7)               | 16(14,19)                          | 14(12,17)                      | 6(4,8)                  | 7(5,10)                               | 25(22,29)                    | 41(38,46)                                  |
| Q4                                                                                                 | 6(4,8)               | 13(10,16)                          | 12(10,15)                      | 5(4,7)                  | 7(5,9)                                | 25(21,29)                    | 36(32,40)                                  |
| Q5                                                                                                 | 3(2,5)               | 14(11,17)                          | 12(9,15)                       | 5(3,7)                  | 7(5,9)                                | 21(18,25)                    | 34(30,38)                                  |
| P trend                                                                                            | 0.02                 | 0.05                               | 0.16                           | 0.11                    | 0.34                                  | 0.15                         | 0.004                                      |
| RR (95%CI) for Q5 compared to Q1                                                                   | 0.5(0.3,0.8)         | 0.9(0.6,1.1)                       | 0.9(0.6,1.2)                   | 0.8(0.5,1.3)            | 0.9(0.6,1.4)                          | 0.9(0.7,1.1)                 | 0.8(0.7,1.0)                               |
| <b>“Open-Sandwich” Pattern</b>                                                                     |                      |                                    |                                |                         |                                       |                              |                                            |
| Q1                                                                                                 | 6(4,9)               | 14(11,17)                          | 12(10,15)                      | 7(5,10)                 | 8(6,11)                               | 27(23,31)                    | 40(36,44)                                  |
| Q2                                                                                                 | 5(4,8)               | 16(14,20)                          | 14(11,16)                      | 6(4,8)                  | 7(5,10)                               | 27(24,31)                    | 41(38,46)                                  |
| Q3                                                                                                 | 6(4,8)               | 14(11,17)                          | 14(12,17)                      | 6(4,8)                  | 8(6,10)                               | 21(18,24)                    | 36(32,40)                                  |
| Q4                                                                                                 | 4(2,6)               | 17(14,21)                          | 14(12,17)                      | 6(5,9)                  | 8(6,11)                               | 23(19,26)                    | 37(33,41)                                  |
| Q5                                                                                                 | 5(4,7)               | 16(13,19)                          | 13(10,16)                      | 5(4,7)                  | 6(5,9)                                | 25(21,29)                    | 39(35,43)                                  |
| P trend                                                                                            | 0.33                 | 0.32                               | 0.91                           | 0.37                    | 0.57                                  | 0.43                         | 0.54                                       |
| RR (95%CI) for Q5 compared to Q1                                                                   | 0.8(0.5,1.4)         | 1.2(0.9,1.6)                       | 1.0(0.8,1.4)                   | 0.7(0.4,1.2)            | 0.8 (0.5,1.3)                         | 0.9(0.7,1.2)                 | 1.0 (0.8,1.1)                              |
| <b>“Vegetarian-like” Pattern</b>                                                                   |                      |                                    |                                |                         |                                       |                              |                                            |
| Q1                                                                                                 | 5(4,8)               | 17(14,20)                          | 15(12,18)                      | 7(5,9)                  | 8(6,11)                               | 27(24,31)                    | 41(37,45)                                  |
| Q2                                                                                                 | 5(4,7)               | 15(12,18)                          | 13(10,15)                      | 4(3,6)                  | 6(4,8)                                | 22(19,25)                    | 36(33,41)                                  |
| Q3                                                                                                 | 5(4,7)               | 15(13,18)                          | 13(11,16)                      | 6(4,8)                  | 7(5,9)                                | 24(21,28)                    | 38(34,42)                                  |
| Q4                                                                                                 | 6(4,8)               | 14(12,17)                          | 12(10,15)                      | 8(6,10)                 | 9(6,11)                               | 28(24,32)                    | 41(37,45)                                  |
| Q5                                                                                                 | 5(3,7)               | 16(13,19)                          | 14(11,17)                      | 6(4,9)                  | 8(6,11)                               | 22(18,25)                    | 36(33,41)                                  |
| P trend                                                                                            | 0.64                 | 0.71                               | 0.77                           | 0.56                    | 0.72                                  | 0.22                         | 0.39                                       |
| RR (95%CI) for Q5 compared to Q1                                                                   | 0.9(0.5,1.4)         | 1.0(0.7,1.2)                       | 1.0(0.7,1.3)                   | 1.0(0.6,1.5)            | 0.9(0.6,1.4)                          | 0.8(0.7,1.0)                 | 0.9(0.8,1.0)                               |

Abbreviations: Q; quintile, 95% CI; 95% confidence intervals, WHO; world health organization, RR; risk ratio. Risk ratio here is comparing between the Q5 and Q1. Models were adjusted for age, body mass index, height, smoking, use of marijuana and other recreational drug, moderate-to-vigorous physical activities (hours/ week), history of reproductive diseases, reproductive surgeries, and sexually transmitted diseases, season and calendar year of the sample, mother's education level, total energy intake, and abstinence time. Sperm motility models were further adjusted for time elapsed between specimen collection and analysis. For assessing relative risks, we used log link function and binary distribution except for semen volume, motility, progressive motility, we used log link function and Poisson distribution due to non-convergence of the binary distribution.

**eTable 8. Adjusted Probabilities of Semen Quality Parameters Below the Damsgaard High Semen Quality Suggested Reference Limits According to Adherence to Data-Derived Dietary Patterns**

| Semen Quality Parameters         | <40 million/mL Sperm concentration | <50% Motile spermatozoa | < 9% Normal sperm morphology | Any semen parameter < Damsgaard High Semen quality reference limits |
|----------------------------------|------------------------------------|-------------------------|------------------------------|---------------------------------------------------------------------|
| <b>“Western” Pattern</b>         |                                    |                         |                              |                                                                     |
| Q1                               | 42(38,46)                          | 15(12,18)               | 65(61,69)                    | 76(72,79)                                                           |
| Q2                               | 46(42,50)                          | 13(11,16)               | 63(59,67)                    | 75(72,79)                                                           |
| Q3                               | 42(38,46)                          | 14(11,17)               | 63(60,67)                    | 73(70,77)                                                           |
| Q4                               | 44(40,48)                          | 15(12,18)               | 69(65,73)                    | 78(75,82)                                                           |
| Q5                               | 46(42,51)                          | 15(12,18)               | 68(64,73)                    | 78(75,82)                                                           |
| P trend                          | 0.14                               | 0.79                    | 0.05                         | 0.14                                                                |
| RR (95%CI) for Q5 compared to Q1 | 1.1(1.0,1.3)                       | 1.0 (0.7,1.3)           | 1.1(1.0,1.2)                 | 1.0 (1.0,1.1)                                                       |
| <b>“Prudent” Pattern</b>         |                                    |                         |                              |                                                                     |
| Q1                               | 47(43,51)                          | 15(12,19)               | 67(63,71)                    | 77(73,80)                                                           |
| Q2                               | 45(41,49)                          | 16(13,19)               | 67(63,71)                    | 76(73,80)                                                           |
| Q3                               | 45(41,49)                          | 13(11,16)               | 68(64,71)                    | 79(76,82)                                                           |
| Q4                               | 42(38,46)                          | 13(11,16)               | 65(61,69)                    | 75(72,79)                                                           |
| Q5                               | 41(37,46)                          | 14(11,17)               | 63(59,67)                    | 74(71,78)                                                           |
| P trend                          | 0.02                               | 0.38                    | 0.11                         | 0.18                                                                |
| RR (95%CI) for Q5 compared to Q1 | 0.9(0.8,1.0)                       | 0.9(0.7,1.2)            | 0.9(0.9,1.0)                 | 1.0 (0.9,1.0)                                                       |
| <b>“Open-Sandwich” Pattern</b>   |                                    |                         |                              |                                                                     |
| Q1                               | 42(38,47)                          | 16(13,19)               | 67(63,71)                    | 76(73,80)                                                           |
| Q2                               | 45(41,49)                          | 16(13,19)               | 67(63,71)                    | 76(73,80)                                                           |
| Q3                               | 45(41,49)                          | 15(12,18)               | 67(64,71)                    | 78(74,81)                                                           |
| Q4                               | 44(40,49)                          | 14(12,17)               | 65(61,69)                    | 77(73,80)                                                           |
| Q5                               | 44(40,48)                          | 12(9,15)                | 62(58,66)                    | 75(71,78)                                                           |
| P trend                          | 0.94                               | 0.03                    | 0.13                         | 0.53                                                                |
| RR (95%CI) for Q5 compared to Q1 | 1.0(0.9,1.2)                       | 0.7(0.5,1.0)            | 0.9(0.8,1.0)                 | 1.0 (0.9,1.1)                                                       |
| <b>“Vegetarian-like” Pattern</b> |                                    |                         |                              |                                                                     |
| Q1                               | 46(42,50)                          | 16(14,20)               | 69(66,73)                    | 79(75,82)                                                           |
| Q2                               | 45(41,49)                          | 13(10,16)               | 63(60,67)                    | 75(71,78)                                                           |
| Q3                               | 45(41,49)                          | 13(11,16)               | 67(63,71)                    | 77(74,81)                                                           |
| Q4                               | 41(37,45)                          | 15(12,18)               | 69(65,73)                    | 77(74,81)                                                           |
| Q5                               | 43(39,48)                          | 15(12,18)               | 61(57,65)                    | 73(70,77)                                                           |
| P trend                          | 0.35                               | 0.77                    | 0.04                         | 0.09                                                                |

|                                  |               |              |              |              |
|----------------------------------|---------------|--------------|--------------|--------------|
| RR (95%CI) for Q5 compared to Q1 | 1.0 (0.8,1.1) | 0.9(0.7,1.2) | 0.9(0.8,1.0) | 0.9(0.9,1.0) |
|----------------------------------|---------------|--------------|--------------|--------------|

Abbreviations: Q; quintile, 95% CI; 95% confidence intervals, RR; risk ratio. Risk ratio here is comparing between the Q5 and Q1.

Damsgaard reference limits: sperm concentration <40 mill/ml, motility <50%, and morphology <9%.

Models were adjusted for age, body mass index, height, smoking, use of marijuana and other recreational drug, moderate-to-vigorous physical activities (hours/ week), history of reproductive diseases, reproductive surgeries, and sexually transmitted diseases, season and calendar year of the sample, mother's education level, total energy intake, and abstinence time. Sperm motility models were further adjusted for time elapsed between specimen collection and analysis.

**eTable 9. Adjusted Median Differences in Semen Quality Parameters and Testicular Volume According to Adherence to Data-Derived Dietary Patterns, Additionally Adjusted for Use of Muscle-Enhancing Supplements**

|                         | Reproductive Parameters | Semen volume, mL | Sperm concentration, million/mL | Total sperm count, million | Motile spermatozoa, % | Total motile sperm count, million | Progressively motile spermatozoa, % | Total progressively motile sperm count, million | Normal sperm morphology, % | Total normal morphologically sperm count, million | Testicular volume by ultrasound, mean (mL) |
|-------------------------|-------------------------|------------------|---------------------------------|----------------------------|-----------------------|-----------------------------------|-------------------------------------|-------------------------------------------------|----------------------------|---------------------------------------------------|--------------------------------------------|
| "Western" Pattern       | Q1                      | Ref              | Ref                             | Ref                        | Ref                   | Ref                               | Ref                                 | Ref                                             | Ref                        | Ref                                               | Ref                                        |
|                         | Q2                      | -0.1 (-0.3,0)    | -1.8 (-7.2,3.5)                 | -9.7 (-24.9,5.5)           | -0.1 (-2.1,9)         | -9 (-20,2)                        | -0.2 (-2.1,1.8)                     | -5 (-16,6)                                      | 0.1 (-0.6,0.8)             | -1 (-3,0)                                         | -0.7 (-1.2,-0.3)                           |
|                         | Q3                      | -0.3 (-0.4,-0.1) | 0.4 (-5.7,6.6)                  | -18.3 (-33.9,-2.7)         | 0.9 (-0.7,2.6)        | -11 (-24,1)                       | 0.3 (-1.7,2.2)                      | -12 (-23,0)                                     | -0.5 (-1,0.1)              | -2 (-3,0)                                         | -0.5 (-1,0)                                |
|                         | Q4                      | -0.3 (-0.5,-0.1) | -0.8 (-6.8,5.2)                 | -11.4 (-26.5,3.7)          | -0.6 (-2.8,1.6)       | -11 (-23,1)                       | -1.1 (-3.4,1.1)                     | -13 (-25,-1)                                    | -0.4 (-1.1,0.3)            | -2 (-3,0)                                         | -0.4 (-1,0.1)                              |
|                         | Q5                      | -0.3 (-0.5,-0.1) | -3.3 (-9.8,3.2)                 | -26.1 (-44,-8.2)           | 1.1 (-0.7,2.9)        | -18 (-31,-5)                      | -0.7 (-2.9,1.5)                     | -17 (-29,-5)                                    | -0.4 (-1.1,0.2)            | -3 (-5,-1)                                        | -0.8 (-1.4,-0.3)                           |
|                         | P trend                 | 0.002            | 0.33                            | 0.01                       | 0.39                  | 0.04                              | 0.22                                | 0.01                                            | 0.06                       | 0.00                                              | 0.06                                       |
| "Prudent" Pattern       | Q1                      | Ref              | Ref                             | Ref                        | Ref                   | Ref                               | Ref                                 | Ref                                             | Ref                        | Ref                                               | Ref                                        |
|                         | Q2                      | 0 (-0.1,0.2)     | 4.7 (-0.7,10.1)                 | 8.7 (-6.5,23.9)            | -0.8 (-2.9,1.4)       | 10 (-3,22)                        | -1.6 (-4,0.8)                       | 9 (-2,19)                                       | 0.2 (-0.5,0.8)             | 0 (-1,2)                                          | 0.3 (-0.1,0.8)                             |
|                         | Q3                      | 0.1 (-0.1,0.2)   | 3 (-2.2,8.2)                    | 15.2 (-0.9,31.4)           | -1.2 (-3.3,0.9)       | 11 (1,22)                         | -2 (-4.1,0.1)                       | 8 (-1,17)                                       | 0.4 (-0.3,1.1)             | 1 (-1,2)                                          | 0.6 (0.1,1)                                |
|                         | Q4                      | 0.1 (-0.1,0.3)   | 6.3 (0.4,12.3)                  | 28.3 (12.9,43.8)           | -0.7 (-2.8,1.5)       | 19 (7,31)                         | -0.6 (-2.6,1.4)                     | 17 (8,27)                                       | 0.5 (-0.2,1.2)             | 2 (1,4)                                           | 0.2 (-0.3,0.6)                             |
|                         | Q5                      | 0.2 (0,0.4)      | 6.9 (1.3,12.6)                  | 43 (23,62.9)               | 0.2 (-1.6,2)          | 31 (17,46)                        | 0.6 (-1.7,2.9)                      | 25 (14,37)                                      | -0.1 (-0.8,0.5)            | 2 (1,4)                                           | 0.3 (-0.2,0.9)                             |
|                         | P trend                 | 0.031            | 0.06                            | <0.0001                    | 0.40                  | <0.0001                           | 0.42                                | <0.0001                                         | 0.04                       | 0.000                                             | 0.45                                       |
| "Open-Sandwich" Pattern | Q1                      | Ref              | Ref                             | Ref                        | Ref                   | Ref                               | Ref                                 | Ref                                             | Ref                        | Ref                                               | Ref                                        |
|                         | Q2                      | 0.1 (-0.1,0.2)   | -2.9 (-8.6,2.8)                 | -4.5 (-19.7,10.7)          | -0.7 (-2.7,1.3)       | -8 (-20,3)                        | -0.3 (-2.2,1.5)                     | -7 (-16,2)                                      | 0.1 (-0.5,0.8)             | 0 (-2,1)                                          | -0.5 (-0.9,-0.1)                           |
|                         | Q3                      | -0.1 (-0.2,0.1)  | 0 (-5.8,5.8)                    | -6.4 (-21.8,9.1)           | 2.4 (0.2,4.5)         | -8 (-21,4)                        | 1.5 (-0.5,3.5)                      | -7 (-18,4)                                      | 0.1 (-0.5,0.7)             | 0 (-2,1)                                          | -0.4 (-0.8,0.1)                            |
|                         | Q4                      | 0 (-0.1,0.2)     | -2.7 (-8.1,2.8)                 | -3.4 (-19.6,12.7)          | 2 (0.2,3.8)           | -6 (-19,6)                        | 0 (-2.3,2.2)                        | -7 (-18,4)                                      | 0.1 (-0.6,0.8)             | 0 (-2,1)                                          | -0.3 (-0.7,0.2)                            |
|                         | Q5                      | 0.1 (-0.1,0.3)   | -3.1 (-8.3,2.2)                 | -6.8 (-24.4,10.9)          | 2.2 (0.5,4)           | -6 (-19,7)                        | 1.7 (-0.5,3.8)                      | -6 (-17,5)                                      | 0.8 (0.2,1.4)              | 0 (-2,1)                                          | -0.5 (-1,0)                                |
|                         | P trend                 | 0.28             | 0.23                            | 0.55                       | 0.009                 | 0.91                              | 0.42                                | 0.63                                            | 0.87                       | 0.70                                              | 0.22                                       |
| "V"                     | Q1                      | Ref              | Ref                             | Ref                        | Ref                   | Ref                               | Ref                                 | Ref                                             | Ref                        | Ref                                               | Ref                                        |

|         |                |                 |                  |                 |           |                |           |                |          |                 |
|---------|----------------|-----------------|------------------|-----------------|-----------|----------------|-----------|----------------|----------|-----------------|
| Q2      | 0.1 (-0.1,0.2) | -0.5 (-5.2,4.3) | 4.9 (-9.1,18.9)  | 2 (-0.3,4.3)    | 6 (-6,19) | 1.8 (-0.7,4.3) | 6 (-4,16) | 0.2 (-0.4,0.8) | 1 (-1,2) | 0 (-0.4,0.4)    |
| Q3      | 0 (-0.1,0.2)   | -1 (-5.9,4)     | 2.2 (-13.6,18)   | 2.3 (0.3,4.3)   | 6 (-6,17) | 2.6 (0.3,4.8)  | 6 (-4,16) | 0.1 (-0.5,0.6) | 0 (-2,1) | -0.3 (-0.7,0.2) |
| Q4      | 0 (-0.2,0.2)   | 5.7 (0.4,11.1)  | 11.2 (-3.5,25.9) | -0.7 (-2.8,1.5) | 6 (-6,17) | 0.3 (-1.9,2.5) | 4 (-6,15) | 0.8 (0.2,1.4)  | 0 (-1,2) | 0.1 (-0.4,0.5)  |
| Q5      | 0.2 (0,0.4)    | -0.3 (-5.9,5.4) | 6 (-11.9,24)     | 0.9 (-1.1,3)    | 5 (-6,16) | 1.0 (-1.5,3.4) | 8 (-2,18) | 0.8 (0.2,1.4)  | 1 (0,3)  | 0.2 (-0.3,0.6)  |
| P trend | 0.10           | 0.60            | 0.17             | 0.60            | 0.23      | 0.59           | 0.27      | 0.08           | 0.30     | 0.25            |

Abbreviations: Q; quintile, Ref; reference.

12 men were missing data on the muscle enhancing supplements. Models were adjusted for age, body mass index, height, smoking, use of marijuana and other recreational drug, moderate-to-vigorous physical activities (hours/ week), history of reproductive diseases, reproductive surgeries, and sexually transmitted diseases, season and calendar year of the sample, mother's education level, total energy intake, abstinence time, and use of muscle enhancing supplements. Sperm motility models were further adjusted for time elapsed between specimen collection and analysis.

**eTable 10. Adjusted Median Differences in Serum Reproductive Hormone Concentrations on the Scale for the Individual Hormones as Stated in the Table According to Adherence to Data-Derived Dietary Patterns, Additionally Adjusted for Use of Muscle-Enhancing Supplements**

| Reproductive Parameters |         | Total Testosterone, nmol/L | Free Testosterone, pmol/L | Estradiol, pg/mL | LH, IU/L        | Inhibin-B, pg/mL | FSH, IU/L      | SHBG, nmol/L    | Inhibin-B/FSH | Total Testosterone/LH | Free Testosterone/LH | Estradiol/Total Testosterone | (Estradiol/Free Testosterone)*100 |
|-------------------------|---------|----------------------------|---------------------------|------------------|-----------------|------------------|----------------|-----------------|---------------|-----------------------|----------------------|------------------------------|-----------------------------------|
| “Western” Pattern       | Q1      | Ref                        | Ref                       | Ref              | Ref             | Ref              | Ref            | Ref             | Ref           | Ref                   | Ref                  | Ref                          | Ref                               |
|                         | Q2      | 0.1 (-0.5,0.8)             | 10 (-6,26)                | 0 (-3,3)         | 0.1 (-0.1,0.3)  | -3 (-10,4)       | 0.1 (-0.1,0.3) | 0.3 (-1.3,1.8)  | -7 (-15,1)    | -0.1 (-0.4,0.2)       | 3 (-5,11)            | -0.1 (-0.3,0.1)              | -0.5 (-1.4,0.3)                   |
|                         | Q3      | 0.5 (-0.2,1.3)             | 22 (4,41)                 | 2 (-2,5)         | 0 (-0.2,0.2)    | 8 (0,15)         | 0.1 (-0.1,0.3) | -0.5 (-2.1,1.1) | -3 (-12,5)    | 0.1 (-0.3,0.4)        | 6 (-3,14)            | 0 (-0.2,0.2)                 | -0.5 (-1.4,0.4)                   |
|                         | Q4      | 0.8 (0.1,1.5)              | 28 (10,46)                | 1 (-3,4)         | 0.2 (0,0.4)     | -4 (-12,3)       | 0.2 (0,0.4)    | 0.1 (-1.6,1.7)  | -12 (-19,-4)  | 0 (-0.3,0.4)          | 3 (-7,12)            | 0 (-0.2,0.2)                 | -0.9 (-1.9,0)                     |
|                         | Q5      | 0.9 (0,1.7)                | 47 (27,67)                | 4 (1,7)          | 0.2 (0,0.4)     | -10 (-17,-3)     | 0.2 (0,0.5)    | -0.7 (-2.3,1)   | -14 (-23,-6)  | 0.2 (-0.2,0.5)        | 11 (2,19)            | 0 (-0.2,0.2)                 | -1 (-1.9,-0.2)                    |
|                         | P trend | 0.02                       | <0.0001                   | 0.08             | 0.15            | 0.01             | 0.05           | 0.32            | 0.001         | 0.66                  | 0.007                | 0.63                         | 0.010                             |
| “Prudent” Pattern       | Q1      | Ref                        | Ref                       | Ref              | Ref             | Ref              | Ref            | Ref             | Ref           | Ref                   | Ref                  | Ref                          | Ref                               |
|                         | Q2      | -0.2 (-0.9,0.5)            | 5 (-14,24)                | -2 (-5,1)        | 0 (-0.2,0.2)    | 2 (-5,8)         | 0.1 (-0.1,0.3) | 0.4 (-1.1,1.9)  | -2 (-9,5)     | -0.1 (-0.4,0.3)       | 1 (-7,9)             | 0 (-0.2,0.2)                 | -0.4 (-1.2,0.4)                   |
|                         | Q3      | 0.1 (-0.6,0.9)             | -1 (-20,19)               | -3 (-6,-1)       | -0.2 (-0.4,0)   | 11 (3,18)        | -0.2 (-0.4,0)  | 0.4 (-1.1,1.9)  | 8 (1,15)      | 0.3 (0,0.6)           | 7 (-2,15)            | -0.1 (-0.3,0)                | -0.4 (-1.1,0.3)                   |
|                         | Q4      | -0.1 (-0.8,0.7)            | 1 (-18,20)                | -5 (-8,-2)       | -0.1 (-0.3,0.1) | 1 (-6,8)         | 0.1 (-0.1,0.3) | 0 (-1.5,1.4)    | -1 (-8,5)     | 0.1 (-0.3,0.5)        | 0 (-8,8)             | -0.1 (-0.3,0.1)              | -0.4 (-1.2,0.4)                   |
|                         | Q5      | -0.1 (-0.8,0.7)            | -9 (-28,10)               | -5 (-9,-2)       | 0 (-0.3,0.2)    | 4 (-3,11)        | 0.1 (-0.1,0.3) | 1.5 (-0.1,3.1)  | -3 (-9,3)     | 0.1 (-0.3,0.5)        | 5 (-3,13)            | -0.1 (-0.3,0)                | -0.3 (-1.2,0.5)                   |
|                         | P trend | 0.98                       | 0.27                      | 0.001            | 0.52            | 0.74             | 0.59           | 0.07            | 0.47          | 0.66                  | 0.51                 | 0.14                         | 0.58                              |
| “Open-Sandwich” Pattern | Q1      | Ref                        | Ref                       | Ref              | Ref             | Ref              | Ref            | Ref             | Ref           | Ref                   | Ref                  | Ref                          | Ref                               |
|                         | Q2      | 0.2 (-0.5,1)               | 10 (-9,28)                | 2 (-1,6)         | 0.1 (-0.1,0.3)  | -1 (-9,7)        | 0.1 (-0.1,0.3) | 0.2 (-1.2,1.6)  | 0 (-7,6)      | 0.1 (-0.3,0.4)        | 2 (-6,11)            | 0 (-0.2,0.2)                 | 0.3 (-0.5,1.1)                    |
|                         | Q3      | 0 (-0.8,0.7)               | 4 (-13,22)                | 0 (-3,4)         | 0.1 (-0.1,0.3)  | 0 (-9,8)         | 0 (-0.1,0.2)   | 0.6 (-0.9,2.1)  | 1 (-6,9)      | -0.2 (-0.6,0.2)       | -5 (-13,3)           | 0.1 (-0.1,0.4)               | 0.3 (-0.5,1.1)                    |
|                         | Q4      | 0.5 (-0.3,1.3)             | -6 (-26,15)               | 4 (1,8)          | 0.3 (0.1,0.5)   | 1 (-7,8)         | 0 (-0.2,0.3)   | 1.3 (-0.2,2.7)  | 0 (-7,8)      | -0.2 (-0.6,0.1)       | -9 (-17,-1)          | 0.1 (-0.1,0.3)               | 0.7 (-0.2,1.6)                    |
|                         | Q5      | 0.6 (-0.2,1.5)             | 1 (-19,21)                | 4 (0,7)          | 0.2 (0,0.4)     | -8 (-15,0)       | 0.1 (-0.1,0.3) | 1.3 (-0.3,3)    | -6 (-13,1)    | -0.3 (-0.7,0)         | -8 (-16,0)           | -0.1 (-0.3,0.2)              | 0.5 (-0.3,1.4)                    |
|                         | P trend | 0.18                       | 0.46                      | 0.05             | 0.04            | 0.04             | 0.30           | 0.07            | 0.13          | 0.03                  | 0.02                 | 0.19                         | 0.57                              |
| “Very High”             | Q1      | Ref                        | Ref                       | Ref              | Ref             | Ref              | Ref            | Ref             | Ref           | Ref                   | Ref                  | Ref                          | Ref                               |



|  |         |                 |            |           |                 |              |                |                |             |               |           |                 |                 |
|--|---------|-----------------|------------|-----------|-----------------|--------------|----------------|----------------|-------------|---------------|-----------|-----------------|-----------------|
|  | Q2      | 0.7 (0,1.5)     | 5 (-11,22) | 2 (-1,6)  | 0 (-0.2,0.3)    | -4 (-11,3)   | 0.1 (-0.1,0.3) | 0.5 (-0.9,1.9) | -8 (-14,-1) | 0.4 (0.1,0.8) | 8 (1,16)  | -0.1 (-0.3,0.1) | -0.2 (-1.1,0.6) |
|  | Q3      | -0.1 (-0.7,0.6) | 4 (-13,21) | 1 (-2,4)  | 0 (-0.2,0.2)    | -3 (-11,4)   | 0.2 (0,0.5)    | 0.4 (-0.9,1.7) | -9 (-16,-2) | 0 (-0.3,0.3)  | 0 (-7,7)  | 0 (-0.2,0.2)    | 0.3 (-0.6,1.2)  |
|  | Q4      | 0.9 (0.2,1.7)   | 5 (-11,21) | 2 (-2,5)  | 0.1 (-0.2,0.3)  | -4 (-11,4)   | 0.1 (-0.1,0.3) | 1.4 (0,2.8)    | -6 (-14,1)  | 0.4 (0,0.7)   | 4 (-3,12) | -0.2 (-0.4,0)   | -0.5 (-1.3,0.4) |
|  | Q5      | 0.8 (0.1,1.5)   | 10 (-8,28) | -1 (-4,3) | -0.1 (-0.3,0.1) | -10 (-17,-3) | 0.1 (-0.2,0.3) | 1.7 (0.2,3.3)  | -8 (-15,-2) | 0.5 (0.1,0.8) | 8 (0,16)  | -0.2 (-0.3,0)   | -0.8 (-1.6,0)   |
|  | P trend | 0.10            | 0.35       | 0.39      | 0.35            | 0.015        | 0.94           | 0.02           | 0.08        | 0.06          | 0.36      | 0.05            | 0.04            |

Abbreviations: Q; quintile, LH; Luteinizing Hormone, FSH; Follicle stimulating hormone, SHBG; Sex Hormone Binding Globulin, Ref; reference.  
13 men were missing data on the muscle enhancing supplements.

Models were adjusted for age, body mass index, height, smoking, use of marijuana and other recreational drug, moderate-to-vigorous physical activities (hours/ week), history of reproductive diseases, reproductive surgeries, and sexually transmitted diseases, season and calendar year of the sample, mother's education level, total energy intake, time of the day of the sample collection, and use of muscle enhancing supplements n.

**eTable 11. Adjusted Median Differences in Semen Quality Parameters and Testicular Volume According to Adherence to Data-Derived Dietary Patterns, Without Adjustment for Body Mass Index**

|                           | Reproductive Parameters | Semen volume, mL | Sperm concentration, million/mL | Total sperm count, million | Motile spermatozoa, % | Total motile sperm count, million | Progressively motile spermatozoa, % | Total progressively motile sperm count, million | Normal sperm morphology, % | Total normal morphologically sperm count, million | Testicular volume by ultrasound, mean (mL) |
|---------------------------|-------------------------|------------------|---------------------------------|----------------------------|-----------------------|-----------------------------------|-------------------------------------|-------------------------------------------------|----------------------------|---------------------------------------------------|--------------------------------------------|
| "Western" Pattern         | Q1                      | Ref              | Ref                             | Ref                        | Ref                   | Ref                               | Ref                                 | Ref                                             | Ref                        | Ref                                               | Ref                                        |
|                           | Q2                      | -0.2 (-0.3,0)    | -2 (-7.3,3.2)                   | -11 (-26,4)                | -0.1 (-2.0,1.8)       | -6 (-18,6)                        | 0.1 (-2.1,2.2)                      | -4 (-14,6)                                      | 0.2 (-0.5,0.8)             | -1 (-3,1)                                         | -0.7 (-1.2,-0.2)                           |
|                           | Q3                      | -0.3 (-0.5,-0.1) | -0.4 (-6.1,5.3)                 | -19 (-34,-3)               | 1.0 (-0.6,2.5)        | -11 (-24,2)                       | 0.3 (-1.8,2.4)                      | -10 (-21,1)                                     | 0.1 (-0.5,0.8)             | -2 (-3,0)                                         | -0.5 (-1,0)                                |
|                           | Q4                      | -0.3 (-0.4,-0.1) | -1.7 (-7.4,4)                   | -12 (-26,2)                | -0.8 (-2.8,1.3)       | -10 (-23,3)                       | -0.8 (-3.2,1.6)                     | -10 (-21,2)                                     | -0.3 (-0.9,0.2)            | -2 (-4,0)                                         | -0.5 (-1,0.1)                              |
|                           | Q5                      | -0.3 (-0.5,-0.2) | -2.8 (-9.1,3.4)                 | -27 (-43,-11)              | 1.1 (-0.7,2.9)        | -16 (-30,-2)                      | -0.1 (-2.4,2.2)                     | -14 (-26,-2)                                    | -0.2 (-0.9,0.5)            | -3 (-4,-1)                                        | -0.9 (-1.5,-0.3)                           |
|                           | P trend                 | 0.001            | 0.34                            | 0.009                      | 0.47                  | 0.10                              | 0.38                                | 0.03                                            | 0.15                       | 0.01                                              | 0.06                                       |
| "Prudent" Pattern         | Q1                      | Ref              | Ref                             | Ref                        | Ref                   | Ref                               | Ref                                 | Ref                                             | Ref                        | Ref                                               | Ref                                        |
|                           | Q2                      | 0 (-0.2,0.2)     | 4.1 (-1.3,9.5)                  | 7 (-8,22)                  | -1.1 (-3.2,1)         | 10 (-2,23)                        | -1.6 (-4,0.7)                       | 9 (-2,19)                                       | -0.4 (-1,0.3)              | 0 (-2,1)                                          | 0.2 (-0.3,0.6)                             |
|                           | Q3                      | 0.1 (-0.1,0.2)   | 3.1 (-1.9,8.2)                  | 13 (-2,27)                 | -1.7 (-3.7,0.3)       | 10 (-2,21)                        | -2.1 (-4.4,0.1)                     | 8 (-1,17)                                       | 0.2 (-0.5,0.9)             | 1 (-1,2)                                          | 0.6 (0.1,1.1)                              |
|                           | Q4                      | 0.1 (0,0.3)      | 6.3 (0.3,12.2)                  | 24 (10,39)                 | -1.1 (-3.1,1)         | 20 (8,32)                         | -0.9 (-3,1.2)                       | 17 (8,27)                                       | 0.4 (-0.3,1.1)             | 2 (1,4)                                           | 0.2 (-0.2,0.7)                             |
|                           | Q5                      | 0.2 (0,0.4)      | 6.5 (1.1,11.9)                  | 39 (20,58)                 | -0.3 (-1.9,1.4)       | 28 (13,43)                        | 0 (-2.3,2.2)                        | 25 (12,37)                                      | 0.5 (-0.3,1.2)             | 2 (0,4)                                           | 0.3 (-0.2,0.9)                             |
|                           | P trend                 | 0.008            | 0.05                            | <0.0001                    | 0.56                  | <0.0001                           | 0.72                                | <0.0001                                         | 0.02                       | 0.001                                             | 0.12                                       |
| "Open-Sandwich" Pattern   | Q1                      | Ref              | Ref                             | Ref                        | Ref                   | Ref                               | Ref                                 | Ref                                             | Ref                        | Ref                                               | Ref                                        |
|                           | Q2                      | 0 (-0.2,0.2)     | -3.1 (-9,2.7)                   | -5 (-19,9)                 | -0.5 (-2.4,1.4)       | -8 (-19,3)                        | -0.4 (-2.2,1.5)                     | -6 (-15,3)                                      | -0.2 (-0.9,0.4)            | 0 (-2,1)                                          | -0.5 (-0.9,0)                              |
|                           | Q3                      | -0.2 (-0.3,0)    | 0.4 (-5.3,6.2)                  | -6 (-20,9)                 | 2.7 (0.6,4.7)         | -3 (-16,10)                       | 1.5 (-0.5,3.6)                      | -5 (-16,7)                                      | 0.1 (-0.5,0.7)             | 0 (-2,2)                                          | -0.4 (-0.9,0.1)                            |
|                           | Q4                      | 0 (-0.2,0.1)     | -2.7 (-8,2.7)                   | -2 (-18,14)                | 2.2 (0.5,3.8)         | -6 (-19,8)                        | -0.1 (-2.3,2.2)                     | -3 (-14,8)                                      | 0.2 (-0.5,0.8)             | 0 (-2,2)                                          | -0.3 (-0.8,0.2)                            |
|                           | Q5                      | 0 (-0.1,0.2)     | -3.9 (-8.9,1.1)                 | -5 (-21,11)                | 2.3 (0.7,3.9)         | -4 (-17,10)                       | 1.7 (-0.6,3.9)                      | -3 (-14,8)                                      | -0.1 (-0.8,0.7)            | 0 (-2,2)                                          | -0.4 (-0.9,0.1)                            |
|                           | P trend                 | 0.21             | 0.17                            | 0.69                       | 0.012                 | 0.93                              | 0.40                                | 0.80                                            | 0.49                       | 0.65                                              | 0.29                                       |
| "Vegetarian-like" Pattern | Q1                      | Ref              | Ref                             | Ref                        | Ref                   | Ref                               | Ref                                 | Ref                                             | Ref                        | Ref                                               | Ref                                        |
|                           | Q2                      | 0.1 (-0.1,0.2)   | -0.2 (-4.9,4.5)                 | 5 (-9,19)                  | 1.9 (-0.4,4.2)        | 4 (-9,17)                         | 2 (-0.4,4.5)                        | 5 (-5,15)                                       | 0.5 (-0.1,1.2)             | 1 (-1,2)                                          | 0 (-0.5,0.4)                               |
|                           | Q3                      | 0 (-0.1,0.2)     | -0.6 (-5.6,4.3)                 | 6 (-9,21)                  | 2 (0,4)               | 4 (-9,17)                         | 2.9 (0.8,5.1)                       | 7 (-3,17)                                       | 0.1 (-0.5,0.7)             | 0 (-2,1)                                          | -0.3 (-0.9,0.2)                            |
|                           | Q4                      | 0 (-0.2,0.2)     | 5.8 (0.6,11)                    | 12 (-2,27)                 | -0.7 (-2.7,1.3)       | 1 (-10,12)                        | 0.7 (-1.4,2.9)                      | 3 (-6,13)                                       | 0 (-0.6,0.6)               | 0 (-1,2)                                          | 0 (-0.5,0.5)                               |
|                           | Q5                      | 0.2 (0,0.3)      | 0.8 (-4.6,6.2)                  | 6 (-11,23)                 | 0.8 (-1.1,2.8)        | 5 (-7,16)                         | 1.7 (-0.6,4)                        | 8 (-2,18)                                       | 0.8 (0.2,1.4)              | 1 (0,3)                                           | 0.1 (-0.4,0.5)                             |
|                           | P trend                 | 0.18             | 0.37                            | 0.12                       | 0.88                  | 0.23                              | 0.70                                | 0.27                                            | 0.08                       | 0.18                                              | 0.39                                       |

Abbreviations: Q; quintile, Ref; reference.

Models were adjusted for age, height, smoking, use of marijuana and other recreational drug, moderate-to-vigorous physical activities (hours/ week), history of reproductive diseases, reproductive surgeries, and sexually transmitted diseases, season and calendar year of the sample, mother's education level, total energy intake, and abstinence time. Sperm motility models were further adjusted for time elapsed between specimen collection and analysis.

**eTable 12. Adjusted Median Differences in Serum Reproductive Hormone Concentrations on the Scale for the Individual Hormones as Stated in the Table According to Adherence to Data-Derived Dietary Patterns, Without Adjustment for Body Mass Index**

|                           | Reproductive Parameters | Total Testosterone, nmol/L | Free Testosterone, pmol/L | Estradiol, pg/mL | LH, IU/L        | Inhibin-B, pg/mL | FSH, IU/L       | SHBG, nmol/L    | Inhibin-B/ FSH | Total Testosterone/ LH | Free Testosterone/ LH | Estradiol/ Total Testosterone | (Estradiol/ Free Testosterone) *100 |
|---------------------------|-------------------------|----------------------------|---------------------------|------------------|-----------------|------------------|-----------------|-----------------|----------------|------------------------|-----------------------|-------------------------------|-------------------------------------|
| "Western" Pattern         | Q1                      | Ref                        | Ref                       | Ref              | Ref             | Ref              | Ref             | Ref             | Ref            | Ref                    | Ref                   | Ref                           | Ref                                 |
|                           | Q2                      | 0.3 (-0.3,1)               | 12 (-4,29)                | 1 (-3,4)         | 0.1 (0.0,0.3)   | -6 (-14,1)       | 0.1 (-0.1,0.4)  | 0.7 (-0.8,2.2)  | -6 (-14,3)     | -0.1 (-0.5,0.2)        | 3 (-5,12)             | -0.1 (-0.3,0.1)               | -0.1 (-1,0.8)                       |
|                           | Q3                      | 0.6 (-0.1,1.4)             | 23 (5,42)                 | 3 (-1,7)         | 0 (-0.1,0.2)    | 4 (-5,12)        | 0.1 (-0.1,0.4)  | -0.7 (-2.1,0.7) | -1 (-9,8)      | 0 (-0.4,0.3)           | 6 (-2,15)             | -0.1 (-0.3,0.2)               | -0.3 (-1.2,0.6)                     |
|                           | Q4                      | 0.9 (0.2,1.6)              | 30 (12,49)                | 2 (-2,6)         | 0.1 (-0.1,0.3)  | -3 (-12,5)       | 0.3 (0.0,0.5)   | 1 (-0.5,2.5)    | -11 (-19,-3)   | 0 (-0.4,0.3)           | 5 (-5,14)             | -0.1 (-0.3,0.1)               | -0.9 (-1.8,0)                       |
|                           | Q5                      | 1 (0.1,1.8)                | 47 (28,67)                | 4 (1,8)          | 0.2 (0,0.4)     | -12 (-20,-4)     | 0.2 (0.0,0.5)   | -1.2 (-2.6,0.3) | -12 (-21,-3)   | 0 (-0.4,0.3)           | 11 (2,19)             | -0.1 (-0.3,0.1)               | -0.9 (-1.8,0)                       |
|                           | P trend                 | 0.029                      | <0.0001                   | 0.08             | 0.13            | 0.006            | 0.10            | 0.08            | 0.007          | 0.54                   | 0.01                  | 0.36                          | 0.018                               |
| "Prudent" Pattern         | Q1                      | Ref                        | Ref                       | Ref              | Ref             | Ref              | Ref             | Ref             | Ref            | Ref                    | Ref                   | Ref                           | Ref                                 |
|                           | Q2                      | -0.3 (-1.1,0.4)            | 5 (-14,25)                | -3 (-6,1)        | 0 (-0.2,0.2)    | 1 (-6,8)         | 0.1 (-0.1,0.3)  | 0.3 (-1.1,1.8)  | -4 (-11,3)     | -0.1 (-0.4,0.2)        | 1 (-7,9)              | 0 (-0.2,0.2)                  | 0 (-0.8,0.8)                        |
|                           | Q3                      | 0.2 (-0.6,0.9)             | -2 (-22,18)               | -3 (-6,0)        | -0.2 (-0.4,0)   | 8 (0,16)         | -0.2 (-0.4,0.0) | 0.4 (-1.1,1.7)  | 7 (0,14)       | 0.3 (-0.1,0.6)         | 7 (-2,16)             | -0.1 (-0.3,0.1)               | -0.1 (-0.8,0.6)                     |
|                           | Q4                      | -0.2 (-1,0.5)              | 1 (-18,20)                | -4 (-8,-1)       | 0 (-0.2,0.2)    | 1 (-7,8)         | 0.1 (-0.1,0.3)  | -0.4 (-1.9,1.1) | -5 (-12,1)     | 0 (-0.4,0.3)           | 0 (-9,9)              | -0.1 (-0.2,0.1)               | -0.2 (-1,0.7)                       |
|                           | Q5                      | -0.2 (-1,0.5)              | -10 (-29,9)               | -5 (-9,-1)       | -0.1 (-0.3,0.2) | 0 (-8,7)         | 0.1 (-0.1,0.4)  | 1.4 (-0.1,2.9)  | -6 (-13,1)     | 0.1 (-0.3,0.4)         | 5 (-3,14)             | -0.1 (-0.3,0.1)               | 0 (-0.9,0.8)                        |
|                           | P trend                 | 0.97                       | 0.20                      | 0.001            | 0.69            | 0.89             | 0.43            | 0.39            | 0.22           | 0.81                   | 0.64                  | 0.52                          | 0.95                                |
| "Vegetarian-like" Pattern | Q1                      | Ref                        | Ref                       | Ref              | Ref             | Ref              | Ref             | Ref             | Ref            | Ref                    | Ref                   | Ref                           | Ref                                 |
|                           | Q2                      | 0.1 (-0.6,0.9)             | 7 (-11,26)                | 3 (-1,7)         | 0.1 (-0.1,0.3)  | -6 (-13,2)       | 0.1 (-0.1,0.3)  | -0.3 (-1.5,0.8) | 0 (-7,7)       | 0 (-0.3,0.4)           | 2 (-7,11)             | 0 (-0.2,0.2)                  | 0.3 (-0.5,1.1)                      |
|                           | Q3                      | -0.1 (-0.8,0.7)            | 4 (-15,23)                | 1 (-2,5)         | 0.1 (-0.1,0.2)  | -2 (-10,6)       | 0.0 (-0.2,0.2)  | 0 (-1.4,1.5)    | 0 (-8,8)       | -0.2 (-0.5,0.2)        | -5 (-14,3)            | 0 (-0.2,0.2)                  | 0.3 (-0.5,1.2)                      |
|                           | Q4                      | 0.5 (-0.3,1.3)             | -8 (-29,13)               | 5 (1,8)          | 0.3 (0.1,0.4)   | -3 (-11,4)       | 0.1 (-0.2,0.3)  | 1.4 (0.1,2.8)   | 0 (-8,8)       | -0.2 (-0.5,0.2)        | -9 (-19,0)            | 0 (-0.2,0.2)                  | 0.7 (-0.2,1.7)                      |
|                           | Q5                      | 0.4 (-0.5,1.3)             | -4 (-24,17)               | 4 (0,8)          | 0.2 (0.1,0.4)   | -11 (-19,-3)     | 0.1 (-0.1,0.4)  | 0.5 (-1.1,2.2)  | -6 (-14,2)     | -0.2 (-0.6,0.1)        | -6 (-15,4)            | -0.2 (-0.4,0)                 | 0.6 (-0.3,1.5)                      |
|                           | P trend                 | 0.14                       | 0.42                      | 0.08             | 0.01            | 0.02             | 0.41            | 0.24            | 0.11           | 0.11                   | 0.04                  | 0.13                          | 0.37                                |
| "Vegetarian-like"         | Q1                      | Ref                        | Ref                       | Ref              | Ref             | Ref              | Ref             | Ref             | Ref            | Ref                    | Ref                   | Ref                           | Ref                                 |
|                           | Q2                      | 0.8 (0.1,1.4)              | 8 (-10,25)                | 1 (-2,5)         | 0 (-0.2,0.2)    | -1 (-9,6)        | 0.1 (-0.1,0.3)  | 1.3 (0.0,2.6)   | -7 (-13,0)     | 0.3 (0,0.7)            | 8 (0,17)              | -0.1 (-0.3,0.1)               | -0.5 (-1.3,0.4)                     |

|         |              |            |           |                 |            |                |                |            |                |           |                  |                 |
|---------|--------------|------------|-----------|-----------------|------------|----------------|----------------|------------|----------------|-----------|------------------|-----------------|
| Q3      | 0 (-0.7,0.7) | 4 (-12,21) | 1 (-3,4)  | -0.1 (-0.3,0.1) | 0 (-8,9)   | 0.3 (0.0,0.5)  | 1.3 (-0.1,2.7) | -8 (-15,0) | 0.1 (-0.2,0.4) | 1 (-6,9)  | -0.1 (-0.3,0.1)  | 0.2 (-0.7,1.1)  |
| Q4      | 0.8 (0,1.5)  | 5 (-12,21) | 0 (-4,4)  | 0 (-0.2,0.3)    | -1 (-9,8)  | 0.1 (-0.1,0.3) | 2.3 (1.1,3.6)  | -5 (-13,3) | 0.4 (0.1,0.7)  | 5 (-2,12) | -0.3 (-0.5,-0.1) | -0.6 (-1.4,0.2) |
| Q5      | 1 (0.2,1.7)  | 12 (-7,30) | -2 (-6,2) | -0.1 (-0.4,0.1) | -4 (-11,4) | 0.1 (-0.2,0.3) | 2.8 (1.3,4.3)  | -6 (-13,1) | 0.5 (0.2,0.9)  | 9 (1,18)  | -0.3 (-0.5,-0.1) | -1.2 (-2,-0.4)  |
| P trend | 0.03         | 0.24       | 0.09      | 0.18            | 0.046      | 0.94           | 0.0009         | 0.18       | 0.001          | 0.21      | 0.0004           | 0.004           |

Abbreviations: Q; quintile, 95% CI; 95% confidence intervals, LH; Luteinizing Hormone, FSH; Follicle stimulating hormone, SHBG; Sex Hormone Binding Globulin, Ref; reference.

Models were adjusted for age, height, smoking, use of marijuana and other recreational drug, moderate-to-vigorous physical activities (hours/ week), history of reproductive diseases, reproductive surgeries, and sexually transmitted diseases, season and calendar year of the sample, mother's education level, total energy intake, and time of the day of the sample collection.

**eTable 13. Adjusted Median Differences in Semen Quality Parameters and Testicular Volume According to Adherence to Data-Derived Dietary Patterns Among 2169 Men Who Did Not Report Muscle-Enhancing Supplements**

**Adjusted median difference for men who did not report muscle-enhancing supplements among 2169 men**

|                         | Reproductive Parameters | Semen volume, mL | Sperm concentration, million/mL | Total sperm count, million | Motile spermatozoa, % | Total motile sperm count, million | Progressively motile spermatozoa, % | Total progressively motile sperm count, million | Normal sperm morphology, % | Total normal morphologically sperm count, million | Testicular volume by ultrasound, mean (mL) |
|-------------------------|-------------------------|------------------|---------------------------------|----------------------------|-----------------------|-----------------------------------|-------------------------------------|-------------------------------------------------|----------------------------|---------------------------------------------------|--------------------------------------------|
|                         | Q1                      | Ref              | Ref                             | Ref                        | Ref                   | Ref                               | Ref                                 | Ref                                             | Ref                        | Ref                                               | Ref                                        |
| "Western" Pattern       | Q2                      | -0.2 (-0.4,0)    | -0.8 (-7.2,5.6)                 | 1 (-18,20)                 | 0.9 (-1.4,3.1)        | -2 (-16,11)                       | 0.6 (-1.8,3)                        | -1 (-13,12)                                     | 0.1 (-0.7,0.8)             | 0 (-2,2)                                          | -0.7 (-1.3,-0.1)                           |
|                         | Q3                      | -0.2 (-0.4,0)    | 0.9 (-6.5,8.3)                  | -12 (-32,9)                | 0.7 (-1,2.5)          | -10 (-25,4)                       | -0.6 (-3,1.8)                       | -11 (-22,0)                                     | 0.1 (-0.7,0.9)             | -1 (-3,1)                                         | -0.6 (-1.2,0)                              |
|                         | Q4                      | -0.3 (-0.5,-0.1) | -0.5 (-7.5,6.5)                 | -1 (-21,19)                | 0.7 (-1.6,3.1)        | -7 (-23,8)                        | -0.5 (-3.3,2.2)                     | -10 (-22,3)                                     | -0.6 (-1.2,0)              | -1 (-3,1)                                         | -0.4 (-1.1,0.2)                            |
|                         | Q5                      | -0.3 (-0.5,0)    | -2.6 (-9.7,4.5)                 | -17 (-37,4)                | 1.5 (-0.4,3.5)        | -13 (-28,2)                       | -0.4 (-3,2.2)                       | -12 (-25,0)                                     | -0.2 (-0.9,0.5)            | -2 (-4,0)                                         | -0.9 (-1.6,-0.3)                           |
|                         | P trend                 | 0.03             | 0.37                            | 0.10                       | 0.27                  | 0.09                              | 0.68                                | 0.11                                            | 0.16                       | 0.04                                              | 0.09                                       |
|                         | Q1                      | Ref              | Ref                             | Ref                        | Ref                   | Ref                               | Ref                                 | Ref                                             | Ref                        | Ref                                               | Ref                                        |
| "Prudent" Pattern       | Q2                      | 0.1 (-0.1,0.3)   | 4.1 (-2.2,10.5)                 | 14 (-4,33)                 | -0.7 (-3.1,1.8)       | 11 (-3,25)                        | -1.1 (-3.8,1.6)                     | 10 (-2,21)                                      | -0.5 (-1.2,0.2)            | 0 (-1,2)                                          | 0.3 (-0.3,0.8)                             |
|                         | Q3                      | 0.2 (0,0.3)      | 3.7 (-3,10.4)                   | 18 (-2,38)                 | -0.5 (-2.6,1.6)       | 13 (1,25)                         | -1.3 (-3.7,1)                       | 10 (0,19)                                       | 0.2 (-0.5,0.9)             | 2 (0,3)                                           | 0.6 (0.0,1.1)                              |
|                         | Q4                      | 0.1 (-0.1,0.2)   | 7.2 (0.1,14.3)                  | 27 (8,46)                  | 0.6 (-1.7,2.9)        | 20 (8,32)                         | 0.8 (-1.7,3.4)                      | 17 (5,29)                                       | 0.5 (-0.2,1.2)             | 3 (1,5)                                           | 0.1 (-0.5,0.7)                             |
|                         | Q5                      | 0.3 (0.1,0.5)    | 7.8 (0.5,15.1)                  | 50 (28,72)                 | 1.6 (-0.3,3.6)        | 36 (19,53)                        | 1.7 (-1.4,4)                        | 31 (16,45)                                      | 0.7 (0,1.3)                | 3 (1,5)                                           | 0.5 (-0.1,1.2)                             |
|                         | P trend                 | 0.15             | 0.03                            | <0.0001                    | 0.10                  | <0.0001                           | 0.15                                | 0.0002                                          | 0.01                       | 0.0003                                            | 0.12                                       |
|                         | Q1                      | Ref              | Ref                             | Ref                        | Ref                   | Ref                               | Ref                                 | Ref                                             | Ref                        | Ref                                               | Ref                                        |
| "Open-Sandwich" Pattern | Q2                      | 0 (-0.2,0.2)     | -0.9 (-7.1,5.3)                 | -5 (-23,14)                | 0.5 (-1.5,2.5)        | -5 (-18,8)                        | 0.9 (-1.1,2.9)                      | -2 (-13,9)                                      | 0 (-0.7,0.6)               | 0 (-2,1)                                          | -0.4 (-0.9,0.1)                            |
|                         | Q3                      | -0.1 (-0.3,0.1)  | 1.3 (-5.1,7.7)                  | -6 (-25,13)                | 2.4 (0.3,4.5)         | -4 (-18,10)                       | 1.6 (-0.7,4)                        | -2 (-14,9)                                      | 0.2 (-0.4,0.7)             | 0 (-2,2)                                          | -0.3 (-0.8,0.2)                            |
|                         | Q4                      | 0.1 (-0.2,0.3)   | -0.5 (-6.5,5.5)                 | -2 (-22,18)                | 2.7 (0.7,4.7)         | -1 (-15,14)                       | 1 (-1.6,3.6)                        | -2 (-13,10)                                     | 0.3 (-0.2,0.9)             | 0 (-2,2)                                          | -0.3 (-0.9,0.2)                            |
|                         | Q5                      | 0.1 (-0.1,0.4)   | -1.2 (-7.5,5)                   | -1 (-24,22)                | 2.9 (0.9,4.9)         | -1 (-17,15)                       | 2.3 (0.4,5)                         | 1 (-13,15)                                      | 0.1 (-0.7,0.8)             | 0 (-3,2)                                          | -0.2 (-0.9,0.5)                            |
|                         | P trend                 | 0.11             | 0.20                            | 0.68                       | 0.006                 | 0.76                              | 0.17                                | 0.99                                            | 0.84                       | 0.80                                              | 0.61                                       |
|                         | Q1                      | Ref              | Ref                             | Ref                        | Ref                   | Ref                               | Ref                                 | Ref                                             | Ref                        | Ref                                               | Ref                                        |
| "Veg eta"               | Q2                      | 0.2 (0,0.3)      | 2.9 (-3,8.9)                    | 16 (-3,35)                 | 1.8 (-0.7,4.4)        | 10 (-4,23)                        | 1.4 (-1.9,4.7)                      | 11 (-2,24)                                      | 1 (0.3,1.7)                | 1 (-1,3)                                          | 0.3 (-0.3,0.8)                             |

|         |                |                |            |                 |           |                |           |                |          |                 |
|---------|----------------|----------------|------------|-----------------|-----------|----------------|-----------|----------------|----------|-----------------|
| Q3      | 0 (-0.2,0.2)   | 2.4 (-4.1,8.8) | 8 (-13,30) | 2.5 (0,5)       | 8 (-7,23) | 3.2 (0,6.3)    | 9 (-4,21) | 0.4 (-0.2,1)   | 0 (-1,2) | -0.2 (-0.8,0.4) |
| Q4      | 0.1 (-0.1,0.3) | 8.8 (2,15.6)   | 19 (0,37)  | -0.8 (-3.4,1.8) | 9 (-2,21) | 0.6 (-2.3,3.5) | 9 (-1,20) | 0.2 (-0.3,0.8) | 1 (-1,2) | 0.4 (-0.2,1)    |
| Q5      | 0.2 (0,0.4)    | 1.7 (-5.1,8.4) | 12 (-9,34) | 1.2 (-1.3,3.6)  | 7 (-5,19) | 1.5 (-1.7,4.6) | 8 (-1,18) | 1.2 (0.6,1.9)  | 2 (0,4)  | 0.3 (-0.2,0.9)  |
| P trend | 0.07           | 0.60           | 0.47       | 0.92            | 0.39      | 0.90           | 0.32      | 0.01           | 0.04     | 0.06            |

Abbreviations: 95% CI; 95% confidence intervals.

Models were adjusted for age, body mass index, height, smoking, use of marijuana and other recreational drug, moderate-to-vigorous physical activities (hours/ week), history of reproductive diseases, reproductive surgeries, and sexually transmitted diseases, season and calendar year of the sample, mother's education level, total energy intake, and abstinence time. Sperm motility models were further adjusted for time elapsed between specimen collection and analysis.

\* Tests for trend were conducted across quintiles using the median value in each quintile of the diet patterns as a continuous variable in the regression models.

**eTable 14. Adjusted Median Differences in Serum Reproductive Hormone Concentrations on the Scale for the Individual Hormones as Stated in the Table According to Adherence to Data-Derived Dietary Patterns Among 2169 Men Who Did Not Report Muscle-Enhancing Supplements**

Adjusted median difference for men who did not report muscle-enhancing supplements among 2169 men

|                         | Reproductive Parameters | Total Testosterone, nmol/L | Free Testosterone, pmol/L | Estradiol, pg/mL | Inhibin-B, pg/mL | LH, IU/L       | FSH, IU/L       | SHBG, nmol/L    | Inhibin-B/ FSH | Total Testosterone/ LH | Free Testosterone/ LH | Estradiol/ Total Testosterone | (Estradiol/ Free Testosterone)*100 |
|-------------------------|-------------------------|----------------------------|---------------------------|------------------|------------------|----------------|-----------------|-----------------|----------------|------------------------|-----------------------|-------------------------------|------------------------------------|
|                         | Q1                      | Ref                        | Ref                       | Ref              | Ref              | Ref            | Ref             | Ref             | Ref            | Ref                    | Ref                   | Ref                           | Ref                                |
| "Western" Pattern       | Q2                      | 0.1 (-0.7,1)               | -5 (-25,14)               | 1 (-3,5)         | -2 (-11,7)       | 0 (-0.2,0.2)   | 0.1 (-0.2,0.3)  | 0.6 (-1.2,2.4)  | -5 (-16,6)     | -0.1 (-0.4,0.3)        | 1 (-9,11)             | 0 (-0.2,0.3)                  | 0.4 (-0.6,1.4)                     |
|                         | Q3                      | 0.5 (-0.2,1.3)             | 8 (-12,28)                | 4 (1,8)          | 2 (-7,12)        | 0 (-0.3,0.2)   | 0.1 (-0.2,0.4)  | -0.1 (-2.1,1.9) | -4 (-15,8)     | 0.1 (-0.3,0.5)         | 6 (-4,17)             | 0.1 (-0.2,0.3)                | 0.5 (-0.6,1.5)                     |
|                         | Q4                      | 0.5 (-0.4,1.5)             | 16 (-7,39)                | 3 (-1,7)         | -5 (-15,5)       | 0 (-0.3,0.3)   | 0.2 (0,0.4)     | 0.1 (-1.8,2.1)  | -12 (-22,-1)   | 0 (-0.3,0.4)           | 3 (-9,15)             | 0.1 (-0.1,0.3)                | -0.2 (-1.4,0.9)                    |
|                         | Q5                      | -0.4 (-1.1,0.4)            | 42 (19,65)                | 5 (1,8)          | -13 (-22,-4)     | 0.1 (-0.1,0.4) | 0.1 (-0.1,0.4)  | -0.1 (-2.1,2)   | -12 (-23,-1)   | 0.2 (-0.2,0.6)         | 9 (-1,20)             | 0.1 (-0.1,0.3)                | -0.3 (-1.3,0.8)                    |
|                         | P trend                 | <b>0.03</b>                | <b>&lt;0.0001</b>         | 0.02             | <b>0.002</b>     | 0.31           | 0.27            | 0.79            | <b>0.009</b>   | 0.42                   | <b>0.009</b>          | 0.64                          | <b>0.270</b>                       |
|                         | Q1                      | Ref                        | Ref                       | Ref              | Ref              | Ref            | Ref             | Ref             | Ref            | Ref                    | Ref                   | Ref                           | Ref                                |
| "Prudent" Pattern       | Q2                      | 0.4 (-0.5,1.2)             | -1 (-20,19)               | -4 (-7,-1)       | 1 (-7,9)         | 0.1 (-0.1,0.4) | 0.1 (-0.1,0.4)  | 0.3 (-1.3,2)    | -4 (-12,3)     | -0.2 (-0.6,0.2)        | -2 (-12,9)            | 0 (-0.2,0.2)                  | -0.5 (-1.5,0.4)                    |
|                         | Q3                      | -0.5 (-1.3,0.3)            | -3 (-25,19)               | -4 (-7,-1)       | 11 (2,19)        | 0 (-0.3,0.2)   | -0.1 (-0.3,0.1) | 0.7 (-1.2,3)    | 7 (-1,16)      | 0.2 (-0.2,0.6)         | 4 (-7,15)             | -0.2 (-0.4,0)                 | -0.7 (-1.5,0.1)                    |
|                         | Q4                      | -0.2 (-1.1,0.6)            | -4 (-25,17)               | -8 (-11,-5)      | 2 (-7,12)        | 0 (-0.2,0.2)   | 0.1 (-0.1,0.3)  | 0.4 (-1.3,2.1)  | -4 (-11,4)     | 0 (-0.4,0.4)           | -1 (-11,9)            | -0.2 (-0.4,0)                 | -0.7 (-1.7,0.2)                    |
|                         | Q5                      | -0.2 (-1,0.7)              | -7 (-29,15)               | -6 (-10,-2)      | 7 (-1,16)        | 0.1 (-0.2,0.4) | 0 (-0.2,0.3)    | 1 (-0.8,2.8)    | -1 (-9,7)      | -0.1 (-0.6,0.4)        | 5 (-6,16)             | -0.2 (-0.4,0)                 | -0.4 (-1.4,0.6)                    |
|                         | P trend                 | 0.90                       | 0.68                      | <b>0.001</b>     | 0.07             | 0.56           | 0.91            | <b>0.41</b>     | 0.98           | 0.90                   | 0.26                  | 0.02                          | 0.18                               |
|                         | Q1                      | Ref                        | Ref                       | Ref              | Ref              | Ref            | Ref             | Ref             | Ref            | Ref                    | Ref                   | Ref                           | Ref                                |
| "Open-Sandwich" Pattern | Q2                      | -0.6 (-1.4,0.2)            | -3 (-24,18)               | 1 (-3,5)         | -7 (-17,2)       | 0.2 (-0.1,0.4) | 0.2 (0,0.4)     | -0.1 (-1.7,1.4) | -3 (-11,5)     | -0.1 (-0.5,0.2)        | -5 (-15,5)            | 0 (-0.3,0.2)                  | 0 (-0.9,0.9)                       |
|                         | Q3                      | 0 (-0.9,0.9)               | -5 (-25,15)               | 0 (-3,4)         | -5 (-15,4)       | 0.2 (0,0.4)    | 0.2 (0,0.4)     | 0.6 (-1.1,2.4)  | -3 (-12,5)     | -0.3 (-0.7,0.1)        | -13 (-22,-4)          | 0.1 (-0.1,0.3)                | -0.1 (-1,0.8)                      |
|                         | Q4                      | -0.2 (-1.2,0.8)            | -18 (-41,5)               | 3 (-1,8)         | -3 (-13,7)       | 0.2 (0,0.5)    | 0 (-0.2,0.3)    | 1.1 (-0.4,2.5)  | 1 (-7,8)       | -0.4 (-0.8,0)          | -16 (-27,-5)          | 0 (-0.2,0.2)                  | 0.6 (-0.4,1.6)                     |
|                         | Q5                      | 0.8 (0,1.5)                | -14 (-39,10)              | 2 (-2,7)         | -5 (-15,4)       | 0.3 (0,0.5)    | 0.1 (-0.1,0.4)  | 1.8 (0,3.5)     | -2 (-10,7)     | -0.5 (-0.9,0)          | -16 (-26,-6)          | -0.1 (-0.3,0.2)               | 0.6 (-0.3,1.5)                     |
|                         | P trend                 | 0.82                       | 0.38                      | <b>0.21</b>      | <b>0.73</b>      | 0.04           | 0.83            | 0.06            | 0.47           | <b>0.02</b>            | <b>0.01</b>           | 0.93                          | 0.10                               |
|                         | Q1                      | Ref                        | Ref                       | Ref              | Ref              | Ref            | Ref             | Ref             | Ref            | Ref                    | Ref                   | Ref                           | Ref                                |

|                           |         |                 |            |         |               |                 |                 |                |              |                 |           |                 |                 |
|---------------------------|---------|-----------------|------------|---------|---------------|-----------------|-----------------|----------------|--------------|-----------------|-----------|-----------------|-----------------|
| "Vegetarian-like" Pattern | Q2      | -0.2 (-0.9,0.6) | 5 (-15,26) | 4 (0,8) | -6 (-16,4)    | 0 (-0.3,0.2)    | 0.1 (-0.2,0.3)  | 0.5 (-1,2)     | -9 (-17,-1)  | 0.4 (0,0.9)     | 7 (-2,17) | -0.1 (-0.3,0.1) | -0.3 (-1.3,0.8) |
|                           | Q3      | 1.2 (0.4,2)     | 3 (-19,24) | 4 (0,7) | -5 (-14,4)    | -0.1 (-0.3,0.1) | 0.2 (-0.1,0.4)  | 0.2 (-1.2,1.6) | -11 (-19,-3) | -0.1 (-0.5,0.2) | 0 (-9,9)  | 0.1 (-0.2,0.3)  | 0.4 (-0.4,1.3)  |
|                           | Q4      | 1.1 (0.4,1.9)   | 4 (-15,24) | 4 (0,9) | -5 (-15,6)    | 0.1 (-0.2,0.3)  | -0.1 (-0.3,0.2) | 1.8 (0.4,3.3)  | -2 (-10,7)   | 0.3 (0,0.7)     | 2 (-8,11) | -0.1 (-0.3,0.1) | 0.1 (-0.9,1.1)  |
|                           | Q5      | 1.1 (-0.4,2.5)  | 13 (-9,35) | 3 (0,7) | -15 (-24,-7)  | -0.1 (-0.3,0.1) | 0 (-0.3,0.3)    | 1.6 (0.2,2.9)  | -9 (-17,-2)  | 0.5 (0.1,0.9)   | 7 (-3,18) | -0.1 (-0.3,0.1) | -0.5 (-1.4,0.3) |
|                           | P trend | 0.003           | 0.08       | 0.18    | <b>0.0003</b> | 0.48            | 0.29            | <b>0.04</b>    | 0.53         | 0.02            | 0.11      | 0.31            | 0.15            |

Abbreviations: Q; quintile, 95% CI; 95% confidence intervals, LH; Luteinizing Hormone, FSH; Follicle stimulating hormone, SHBG; Sex Hormone Binding Globulin, Ref; reference.

Models were adjusted for age, height, smoking, use of marijuana and other recreational drug, moderate-to-vigorous physical activities (hours/ week), history of reproductive diseases, reproductive surgeries, and sexually transmitted diseases, season and calendar year of the sample, mother's education level, total energy intake, and time of the day of the sample collection.



**eTable 15. Adjusted Median Differences in Semen Quality Parameters and Testicular Volume According to Adherence to Data-Derived Dietary Patterns Among 1175 Men Who Were Never Smokers, Never Marijuana Users, and Nonusers of Other Recreational Drugs**

Adjusted median difference among never smokers, never marijuana users and non-users of other recreational drugs among 1175 men

|                           | Semen volume, mL | Sperm concentration, million/mL | Total sperm count, million | Motile spermatozoa, % | Total motile sperm count, million | Progressively motile spermatozoa, % | Total progressively motile sperm count, million | Normal sperm morphology, % | Total normal morphologically sperm count, million | Testicular volume by ultrasound, mean (mL) |
|---------------------------|------------------|---------------------------------|----------------------------|-----------------------|-----------------------------------|-------------------------------------|-------------------------------------------------|----------------------------|---------------------------------------------------|--------------------------------------------|
|                           | Q1               | Ref                             | Ref                        | Ref                   | Ref                               | Ref                                 | Ref                                             | Ref                        | Ref                                               | Ref                                        |
| "Western" Pattern         | Q2               | -0.2 (-0.4,0.1)                 | 1 (-6.7,8.6)               | -3 (-26,20)           | -0.1 (-2,1.9)                     | -6 (-23,10)                         | 0.6 (-2.3,3.5)                                  | -6 (-21,9)                 | 0.2 (-0.7,1.2)                                    | -0.7 (-1.4,-0.1)                           |
|                           | Q3               | -0.3 (-0.6,-0.1)                | -0.1 (-8.5,8.2)            | -6 (-30,19)           | 2.1 (-0.1,4.3)                    | -14 (-30,3)                         | 2.3 (-0.7,5.3)                                  | -5 (-21,11)                | 0.3 (-0.9,1.4)                                    | -0.9 (-1.5,-0.2)                           |
|                           | Q4               | 0.0 (-0.2,0.2)                  | -0.1 (-8.2,8)              | -4 (-28,21)           | 1.4 (-1.4,4.1)                    | -5 (-24,13)                         | -0.2 (-3.2,2.9)                                 | -3 (-20,15)                | -1.3 (-2.2,-0.4)                                  | -0.2 (-1.1,0.6)                            |
|                           | Q5               | -0.3 (-0.4,-0.1)                | -6.5 (-16.5,3.4)           | -30 (-60,-1)          | 1.8 (-1.4,5)                      | -22 (-44,0)                         | -0.1 (-3.9,3.7)                                 | -15 (-34,4)                | -1.2 (-2.4,0.0)                                   | -1 (-1.9,-0.1)                             |
|                           | P trend          | 0.18                            | 0.15                       | 0.03                  | 0.40                              | 0.13                                | 0.61                                            | 0.21                       | 0.006                                             | 0.08                                       |
|                           | Q1               | Ref                             | Ref                        | Ref                   | Ref                               | Ref                                 | Ref                                             | Ref                        | Ref                                               | Ref                                        |
| "Prudent" Pattern         | Q2               | 0.1 (-0.2,0.3)                  | 4.9 (-4.4,14.2)            | 40 (17,63)            | -1.9 (-5.7,2.0)                   | 23 (7,39)                           | -0.4 (-4.2,3.4)                                 | 22 (7,38)                  | -0.6 (-1.9,0.6)                                   | 0.4 (-0.2,1.1)                             |
|                           | Q3               | 0.3 (0.1,0.5)                   | 7.7 (-0.7,16.1)            | 61 (38,83)            | -0.2 (-3.6,3.2)                   | 37 (21,52)                          | 0.8 (-2.2,3.9)                                  | 36 (21,50)                 | -0.4 (-1.5,0.8)                                   | 0.7 (-0.1,1.5)                             |
|                           | Q4               | 0.2 (-0.1,0.5)                  | 8.0 (-3.4,19.4)            | 69 (45,92)            | 0.2 (-3.0,3.4)                    | 41 (18,63)                          | -0.4 (-3.4,2.7)                                 | 43 (21,65)                 | 0 (-1.3,1.2)                                      | 0.3 (-0.4,1.0)                             |
|                           | Q5               | 0.5 (0.2,0.7)                   | 9.7 (0.2,19.2)             | 83 (51,115)           | 0.0 (-3.2,3.2)                    | 50 (29,70)                          | 1.4 (-1.4,4.3)                                  | 46 (28,64)                 | 0.3 (-0.9,1.4)                                    | 0.5 (-0.4,1.3)                             |
|                           | P trend          | 0.001                           | 0.11                       | <0.0001               | 0.63                              | <0.0001                             | 0.72                                            | <0.0001                    | 0.51                                              | 0.39                                       |
|                           | Q1               | Ref                             | Ref                        | Ref                   | Ref                               | Ref                                 | Ref                                             | Ref                        | Ref                                               | Ref                                        |
| "Open-Sandwich" Pattern   | Q2               | -0.2 (-0.4,0.0)                 | -4.9 (-15.2,5.4)           | -15 (-44,15)          | -1.0 (-3.7,1.6)                   | -16 (-35,3)                         | -1.0 (-4.3,2.3)                                 | -17 (-33,0)                | -0.4 (-1.3,0.5)                                   | -1.3 (-2.0,-0.6)                           |
|                           | Q3               | -0.2 (-0.4,0.0)                 | -2.7 (-12.8,7.4)           | -4 (-33,24)           | 2.7 (-0.1,5.4)                    | -5 (-31,21)                         | 1.8 (-1.2,4.9)                                  | -2 (-24,20)                | 0.1 (-1.1,1.2)                                    | -0.7 (-1.4,0.0)                            |
|                           | Q4               | 0 (-0.2,0.2)                    | -3.7 (-13.6,6.3)           | -5 (-39,29)           | 1.4 (-1.3,4.1)                    | -10 (-35,15)                        | -0.5 (-3.5,2.5)                                 | -6 (-27,15)                | -0.4 (-1.5,0.7)                                   | -0.8 (-1.5,-0.1)                           |
|                           | Q5               | 0 (-0.3,0.2)                    | -7.1 (-16,1.8)             | -8 (-38,21)           | 2.6 (-0.1,5.4)                    | -12 (-34,11)                        | 0.7 (-2.6,4.1)                                  | -6 (-25,13)                | -1.0 (-2.1,0.2)                                   | -1.1 (-1.9,-0.3)                           |
|                           | P trend          | 0.19                            | 0.07                       | 0.45                  | 0.07                              | 0.67                                | 0.67                                            | 0.91                       | 0.16                                              | 0.12                                       |
|                           | Q1               | Ref                             | Ref                        | Ref                   | Ref                               | Ref                                 | Ref                                             | Ref                        | Ref                                               | Ref                                        |
| "Vegetarian-like" Pattern | Q2               | 0.1 (-0.1,0.3)                  | -2.7 (-11.1,5.6)           | 0 (-22,21)            | 5.5 (2.9,8)                       | 4 (-16,23)                          | 3.6 (0.1,7.1)                                   | 3 (-14,21)                 | 1.1 (0.0,2.2)                                     | -0.4 (-1.1,0.3)                            |
|                           | Q3               | 0.1 (-0.2,0.3)                  | 0.7 (-7.5,8.9)             | 13 (-11,37)           | 2.6 (0.4,4.7)                     | 8 (-11,27)                          | 2.6 (-0.8,5.9)                                  | 11 (-4,26)                 | 0.5 (-0.6,1.6)                                    | 0 (-0.7,0.7)                               |

|         |                |                  |            |                |            |                |            |                |                |
|---------|----------------|------------------|------------|----------------|------------|----------------|------------|----------------|----------------|
| Q4      | 0.1 (-0.2,0.4) | 2.6 (-6.4,11.5)  | 18 (-6,43) | 1.2 (-0.8,3.1) | 5 (-11,21) | 0.4 (-2.9,3.7) | 9 (-5,24)  | 0.1 (-1.0,1.1) | 0.1 (-0.6,0.7) |
| Q5      | 0.3 (0.1,0.4)  | -1.7 (-11.2,7.7) | 8 (-22,38) | 2.3 (-0.2,4.7) | 10 (-7,27) | 0.6 (-3.1,4.2) | 10 (-6,27) | 1.1 (-0.1,2.4) | 0.5 (-0.2,1.2) |
| P trend | 0.07           | 0.61             | 0.90       | 0.44           | 0.92       | 0.54           | 0.75       | 0.66           | 0.18           |

Count of morphologically normal spermatozoa model did not converge.

Abbreviations: 95% CI; 95% confidence intervals.

Models were adjusted for age, body mass index, height, moderate-to-vigorous physical activities (hours/ week), history of reproductive diseases, reproductive surgeries, and sexually transmitted diseases, season and calendar year of the sample, mother's education level, total energy intake, and abstinence time. Sperm motility models were further adjusted for time elapsed between specimen collection and analysis.

\* Tests for trend were conducted across quintiles using the median value in each quintile of the diet patterns as a continuous variable in the regression models.

eTable 16. Adjusted Median Differences in Serum Reproductive Hormone Concentrations on the Scale for the Individual Hormones as Stated in the Table According to Adherence to Data-Derived Dietary Patterns, Among 1175 Men Who Were Never Smokers, Never Marijuana Users, and Nonusers Of Other Recreational Drugs

|                         | Reproductive Parameters | Total Testosterone, nmol/L | Free Testosterone, pmol/L | Estradiol, pg/mL | Inhibin-B, pg/mL | LH, IU/L        | FSH, IU/L        | SHBG, nmol/L    | Inhibin-B/FSH | Total Testosterone/LH | Free Testosterone/LH | Estradiol/Total Testosterone | (Estradiol/Free Testosterone)*100 |
|-------------------------|-------------------------|----------------------------|---------------------------|------------------|------------------|-----------------|------------------|-----------------|---------------|-----------------------|----------------------|------------------------------|-----------------------------------|
|                         | Q1                      | Ref                        | Ref                       | Ref              | Ref              | Ref             | Ref              | Ref             | Ref           | Ref                   | Ref                  | Ref                          | Ref                               |
| "Western" Pattern       | Q2                      | 0.8 (-0.1,1.7)             | 27 (4,50)                 | 4 (0,8)          | -6 (-15,4)       | 0.2 (-0.1,0.4)  | 0.3 (0.1,0.6)    | 2.4 (0.5,4.3)   | -9 (-19,1)    | 0 (-0.5,0.5)          | 3 (-7,14)            | -0.3 (-0.6,-0.1)             | -0.9 (-1.9,0.1)                   |
|                         | Q3                      | 0.4 (-0.6,1.5)             | 11 (-15,37)               | 0 (-5,5)         | -5 (-15,5)       | 0.1 (-0.1,0.4)  | 0.3 (0,0.6)      | 1.1 (-1,3.2)    | -6 (-19,6)    | 0.1 (-0.5,0.6)        | 1 (-9,10)            | -0.5 (-0.7,-0.2)             | -1.2 (-2.4,0.1)                   |
|                         | Q4                      | 0.5 (-0.5,1.4)             | 19 (-4,42)                | -3 (-8,2)        | -10 (-23,4)      | 0.2 (-0.2,0.6)  | 0.4 (0.1,0.8)    | 0.4 (-1.7,2.6)  | -17 (-28,-6)  | -0.1 (-0.8,0.5)       | -13 (-27,1)          | -0.2 (-0.5,0.1)              | -0.1 (-1.3,1.1)                   |
|                         | Q5                      | 0.2 (-0.9,1.2)             | 31 (0,62)                 | 3 (-2,7)         | -20 (-31,-9)     | 0.2 (-0.1,0.4)  | 0.2 (-0.1,0.6)   | 1 (-1.2,3.2)    | -18 (-31,-5)  | 0 (-0.6,0.5)          | 0 (-12,13)           | -0.2 (-0.5,0)                | -1.4 (-2.4,-0.3)                  |
|                         | P trend                 | <b>0.77</b>                | <b>0.09</b>               | 0.84             | <b>0.02</b>      | 0.46            | 0.17             | 0.72            | <b>0.003</b>  | 0.79                  | <b>0.70</b>          | 0.13                         | <b>0.02</b>                       |
|                         | Q1                      | Ref                        | Ref                       | Ref              | Ref              | Ref             | Ref              | Ref             | Ref           | Ref                   | Ref                  | Ref                          | Ref                               |
| "Prudent" Pattern       | Q2                      | 1.1 (-0.2,2.4)             | 11 (-19,41)               | 2 (-4,8)         | 5 (-7,17)        | 0.1 (-0.2,0.4)  | 0.3 (0,0.6)      | 2.3 (0,4.6)     | -6 (-20,7)    | -0.1 (-0.7,0.5)       | -4 (-15,8)           | -0.2 (-0.5,0.1)              | -0.4 (-1.7,0.9)                   |
|                         | Q3                      | 1.2 (-0.1,2.5)             | -8 (-39,24)               | -2 (-6,3)        | 15 (5,25)        | -0.1 (-0.4,0.1) | -0.3 (-0.6,-0.1) | 3.2 (1,5.3)     | 14 (1,26)     | 0.2 (-0.4,0.8)        | 6 (-6,18)            | -0.3 (-0.6,0)                | -0.7 (-1.7,0.4)                   |
|                         | Q4                      | 0.5 (-0.9,1.9)             | 10 (-22,41)               | -2 (-7,3)        | 0 (-12,11)       | 0 (-0.3,0.3)    | 0.3 (0.1,0.5)    | 3.1 (1,5.2)     | -9 (-21,3)    | -0.2 (-0.9,0.5)       | -8 (-19,4)           | -0.2 (-0.5,0.1)              | -0.4 (-1.7,1)                     |
|                         | Q5                      | 0.4 (-0.8,1.7)             | -12 (-43,20)              | -1 (-7,5)        | 3 (-10,16)       | 0.1 (-0.1,0.4)  | 0.2 (-0.1,0.6)   | 4.6 (2.1,7.1)   | -5 (-16,7)    | 0.2 (-0.5,0.8)        | -1 (-12,10)          | -0.2 (-0.6,0.1)              | 0.1 (-1.2,1.4)                    |
|                         | P trend                 | 0.97                       | 0.23                      | <b>0.23</b>      | 0.70             | 0.86            | 0.35             | <b>0.002</b>    | 0.24          | 0.74                  | 0.90                 | 0.54                         | 0.91                              |
|                         | Q1                      | Ref                        | Ref                       | Ref              | Ref              | Ref             | Ref              | Ref             | Ref           | Ref                   | Ref                  | Ref                          | Ref                               |
| "Open-Sandwich" Pattern | Q2                      | -0.3 (-1.3,0.8)            | 19 (-10,49)               | 3 (-2,8)         | -8 (-19,3)       | 0.1 (-0.1,0.4)  | 0 (-0.3,0.4)     | -0.7 (-2.7,1.2) | -2 (-14,11)   | -0.4 (-1.1,0.2)       | -3 (-19,12)          | 0.1 (-0.2,0.3)               | -0.2 (-1.4,1)                     |
|                         | Q3                      | 0.4 (-0.7,1.5)             | 21 (-10,53)               | 4 (-1,9)         | -4 (-15,8)       | 0.3 (0,0.5)     | -0.2 (-0.5,0.2)  | 0.4 (-1.9,2.7)  | 4 (-10,19)    | -0.8 (-1.5,-0.1)      | -9 (-22,5)           | 0 (-0.3,0.3)                 | 0.1 (-1.1,1.3)                    |
|                         | Q4                      | 0.4 (-0.7,1.5)             | 3 (-28,35)                | 3 (-2,8)         | -7 (-17,3)       | 0.4 (0.1,0.6)   | -0.1 (-0.5,0.2)  | 1.5 (-0.8,3.9)  | 3 (-10,17)    | -0.6 (-1.3,0)         | -12 (-27,3)          | 0 (-0.3,0.2)                 | 0.6 (-0.8,2)                      |
|                         | Q5                      | 0.7 (-0.6,2.1)             | 11 (-22,43)               | 1 (-4,6)         | -17 (-28,-6)     | 0.4 (0.1,0.7)   | 0.1 (-0.2,0.5)   | 1.9 (-0.6,4.5)  | -10 (-23,3)   | -1 (-1.7,-0.3)        | -16 (-31,-1)         | -0.2 (-0.5,0)                | -0.3 (-1.4,0.8)                   |
|                         | P trend                 | 0.08                       | 0.63                      | <b>0.38</b>      | <b>0.04</b>      | 0.01            | 0.55             | 0.12            | 0.09          | <b>0.02</b>           | <b>0.02</b>          | 0.04                         | 0.37                              |
|                         | Q1                      | Ref                        | Ref                       | Ref              | Ref              | Ref             | Ref              | Ref             | Ref           | Ref                   | Ref                  | Ref                          | Ref                               |
| "Veg"                   | Q2                      | 1.5 (0.6,2.3)              | 27 (4,49)                 | 4 (-1,8)         | -1 (-13,10)      | 0.4 (0.1,0.7)   | 0.1 (-0.2,0.3)   | 0.1 (-1.8,2.1)  | -9 (-22,3)    | 0.1 (-0.4,0.6)        | 0 (-11,11)           | -0.1 (-0.3,0.2)              | -1.1 (-2.5,0.3)                   |

|         |                |             |          |             |                |                |                |             |                |            |                 |                 |
|---------|----------------|-------------|----------|-------------|----------------|----------------|----------------|-------------|----------------|------------|-----------------|-----------------|
| Q3      | 0.8 (-0.2,1.7) | 22 (-2,47)  | 2 (-2,7) | 7 (-2,16)   | 0.2 (-0.1,0.6) | 0.1 (-0.1,0.4) | 2.2 (0.1,4.3)  | -6 (-18,6)  | 0.1 (-0.5,0.6) | -3 (-14,7) | -0.1 (-0.4,0.2) | -0.2 (-1.6,1.1) |
| Q4      | 0.7 (-0.3,1.8) | 15 (-15,45) | 3 (-2,8) | 7 (-4,18)   | 0.1 (-0.2,0.5) | 0.1 (-0.2,0.4) | 1.4 (-0.4,3.1) | -3 (-17,11) | 0.2 (-0.4,0.8) | 1 (-10,13) | 0 (-0.3,0.3)    | 0.2 (-1.1,1.4)  |
| Q5      | 0.9 (-0.2,2)   | 30 (-2,63)  | 0 (-4,5) | -4 (-13,6)  | 0 (-0.3,0.2)   | 0.1 (-0.2,0.3) | 0.8 (-1.4,3.1) | -9 (-22,3)  | 0.6 (0.0,1.2)  | 13 (1,25)  | -0.2 (-0.4,0.1) | -1.3 (-2.5,0)   |
| P trend | 0.308          | 0.35        | 0.84     | <b>0.87</b> | 0.29           | 0.95           | <b>0.17</b>    | 0.62        | 0.08           | 0.19       | 0.48            | 0.24            |

Abbreviations: Q; quintile, 95% CI; 95% confidence intervals, LH; Luteinizing Hormone, FSH; Follicle stimulating hormone, SHBG; Sex Hormone Binding Globulin, Ref; reference.

Models were adjusted for age, height, moderate-to-vigorous physical activities (hours/ week), history of reproductive diseases, reproductive surgeries, and sexually transmitted diseases, season and calendar year of the sample, mother's education level, total energy intake, and time of the day of the sample collection.

eTable 17. Demographic Characteristics of Men Who Were and were not included in the Analysis

| CHARACTERISTICS                                              | MEDIAN (IQR) OR N (%)                     |                                       |
|--------------------------------------------------------------|-------------------------------------------|---------------------------------------|
|                                                              | Participants not included in the analysis | Participants included in the analysis |
| AGE, YEARS                                                   | 19(19,21)                                 | 19(19,20)                             |
| BODY MASS INDEX, KG/M <sup>2</sup>                           | 22(21,25)                                 | 22(21,24)                             |
| HEIGHT, M                                                    | 1.81(1.75,1.84)                           | 1.82(1.77,1.87)                       |
| CIGARETTES SMOKING, N (%)                                    |                                           |                                       |
| DAILY                                                        | 25(31)                                    | 787(26.81)                            |
| OCCASIONALLY                                                 | 14(17)                                    | 683(23.27)                            |
| NEVER                                                        | 42(52)                                    | 1465(49.91)                           |
| MARIJUANA SMOKING, N (%)                                     |                                           |                                       |
| DAILY                                                        | 5(6)                                      | 110(3.75)                             |
| OCCASIONALLY                                                 | 22(27)                                    | 989(33.7)                             |
| NEVER                                                        | 54(67)                                    | 1836(62.56)                           |
| OTHER RECREATIONAL DRUG USE, N (%)                           | 15(19)                                    | 345(11.75)                            |
| EDUCATION OF THE MOTHER                                      |                                           |                                       |
| < 9 YEARS                                                    | 3(4)                                      | 92(3.13)                              |
| 9-10 YEARS                                                   | 19(23)                                    | 725(24.7)                             |
| > 11 YEARS                                                   | 36(44)                                    | 1665(56.73)                           |
| OTHER                                                        | 3(4)                                      | 183(6.24)                             |
| MISSING/DO NOT KNOW                                          | 20(25)                                    | 270(9.2)                              |
| MODERATE AND VIGOROUS PHYSICAL ACTIVITIES, HR/WK             | 6(2,11)                                   | 8(4,14)                               |
| FEVER IN LAST 3 MONTHS, N (%)                                | 3(4)                                      | 239(8.14)                             |
| SELF-REPORTED HISTORY OF REPRODUCTIVE DISEASES, N (%)        | 11(14)                                    | 605(20.61)                            |
| SELF-REPORTED HISTORY OF REPRODUCTIVE SURGERY, N (%)         | 6(7)                                      | 332(11.31)                            |
| SELF-REPORTED HISTORY OF STDS, N (%)                         | 12(15)                                    | 333(11.35)                            |
| USE OF MUSCLE-ENHANCING PRODUCTS IN THE LAST 3 MONTHS, N (%) | 49(65)                                    | 752(25.74)                            |
| ABSTINENCE TIME, HOURS                                       | 62(53,84)                                 | 62(57,84)                             |
| SAMPLE COLLECTED DURING WARM SEASON, N (%)                   | 26(32)                                    | 950(32.37)                            |
| TIME OF DAY OF SAMPLE COLLECTION, HOUR                       | 10(10,11)                                 | 10(9,11)                              |
| TIME TO MOTILITY ANALYSIS, MIN                               | 30(25,50)                                 | 30(20,45)                             |

|                                                  |                 |                 |
|--------------------------------------------------|-----------------|-----------------|
| <b>TOTAL ENERGY INTAKE, KCAL/DAY</b>             | 2223(1447,6339) | 1990(1536,2547) |
| <b>TOTAL DIETARY FAT (% OF ENERGY)</b>           | 33(27,39)       | 34(30,38)       |
| <b>SATURATED DIETARY FAT (% OF ENERGY)</b>       | 13(10,15)       | 13(11,15)       |
| <b>MONOUNSATURATED DIETARY FAT (% OF ENERGY)</b> | 11(9,13)        | 12(10,13)       |
| <b>POLYUNSATURATED DIETARY FAT (% OF ENERGY)</b> | 5(4,6)          | 5(4,6)          |
| <b>DIETARY PROTEIN (% OF ENERGY)</b>             | 17(15,20)       | 17(16,20)       |
| <b>DIETARY CARBOHYDRATE (% OF ENERGY)</b>        | 50(42,54)       | 48(43,53)       |

Abbreviations: N; number of men, m; meters, hr; hours, wk; week, STDs; sexually transmitted Diseases,  $\alpha$ -TE ; alpha-tocopherol equivalents.

Numbers shown are median and interquartile range unless noted as N(%).

Warm season: April through September.

Reproductive diseases include self-reported history of varicocele, cryptorchidism, testicular mumps, inguinal hernia, testicular injury (hit, kicked or otherwise injured so it caused swelling of the scrotum), hydrocele, testicular torsion, hypospadias, epididymo-orchitis, cystitis or prostatitis.

Reproductive surgeries include self-reported history of surgery for inguinal hernia, varicocele, hydrocele, testicular torsion, hypospadias, testicular cancer, phimosis, testicular biopsy, vasectomy, re-fertilization, and other reproductive surgeries.

STDs included self-reported history of gonorrhea, chlamydia, and other venereal diseases.
